# Supplementary material for: A Ziegler-type spherical cap model reveals early stage ethylene polymerization growth versus catalyst fragmentation relationships
Source: PubMed Central journal article supplement (PMC9402950; doi:10.1038/s41467-022-32635-z), 2022-08-24
Supplement: 41467_2022_32635_MOESM1_ESM.pdf [file 41467_2022_32635_MOESM1_ESM.pdf]

1 **Supplementary Information**

2 **A Ziegler-type Spherical Cap Model Reveals**  
3 **Early Stage Ethylene Polymerization Growth**  
4 **Versus Catalyst Fragmentation Relationships**

5 Koen W. Bossers<sup>1,δ</sup>, Laurens D.B. Mandemaker<sup>1,δ</sup>, Nikolaos Nikolopoulos<sup>1</sup>,  
6 Yuanshuai Liu<sup>1,2</sup>, Marcus Rohnke<sup>3,4</sup>, Peter de Peinder<sup>5</sup>, Bas J.P. Terlingen<sup>1</sup>, Felix  
7 Walther<sup>3,4</sup>, Joren M. Dorresteyn<sup>1</sup>, Thomas Hartman<sup>1</sup>, Bert M. Weckhuysen<sup>\*,1</sup>

8 <sup>1</sup> Inorganic Chemistry & Catalysis, Debye Institute for Nanomaterials Science, Utrecht University, Universiteitsweg  
9 99, 3584 CG Utrecht, The Netherlands

10 <sup>2</sup> Qingdao Institute of Bioenergy and Bioprocess Technology, Chinese Academy of Sciences, Songling Road 189,  
11 266101 Qingdao, China

12 <sup>3</sup> Center for Materials Research, Justus Liebig University, Heinrich-Buff-Ring 16, 35392 Giessen, Germany

13 <sup>4</sup> Institute of Physical Chemistry, Justus Liebig University, Heinrich-Buff-Ring 17, 35392 Giessen, Germany

14 <sup>5</sup> VibSpec, Haaftenlaan 28, 4006 XL Tiel, The Netherlands

15 *δ* These authors contributed equally to this work

16 \*email: [b.m.weckhuysen@uu.nl](mailto:b.m.weckhuysen@uu.nl)

17

18

19

20

21

22

23

24

25

26

27

## 1. X-ray Photo-electron Spectroscopy

The La  $3d_{5/2}$ , La  $4p$  and Cl  $2p$  X-ray photo-electron spectroscopy (XPS) data of the three reference materials, namely  $\text{La}_2\text{O}_3$ ,  $\text{LaOCl}$  and  $\text{LaCl}_3$ , are given in Figure S1. Li *et al.*, have shown in an *in-situ* study on the energy calibration of Lanthanum compounds with XPS that the component splitting ( $\Delta E$ ) of the La  $3d_{5/2}$  signal, which in principle can be used for chemical diagnostics, is highly prone to the measurement conditions and surface chemistry [1]. They found, for instance, that the  $\Delta E$  value of an as-prepared  $\text{La}_2\text{O}_3$  material changed from 3.6 eV to 4.3 eV after vacuum treatment at 800 °C, which basically removes carbon and oxygen adsorbates. Furthermore, they provide a literature summary of reported  $\Delta E$  values for  $\text{La}_2\text{O}_3$ ,  $\text{La}(\text{OH})_3$  and  $\text{La}_2\text{O}_2(\text{CO})_3$  where differences up to 0.7 eV are reported within the same materials. Therefore, although the  $\Delta E$  values of the three reference materials are provided in Figure S1 and a trend is observed showing a decrease in the splitting value with increasing degree of surface chlorination from 4.05 eV for  $\text{La}_2\text{O}_3$  to 3.99 eV for  $\text{LaOCl}$  and finally 3.72 eV for  $\text{LaCl}_3$  the absolute values should be taken with caution. Additionally, the use of the La  $4p$  and Cl  $2p$  XPS signals to follow the surface chemistry of the  $\text{LaOCl}$  spherical caps before and after reaction with  $\text{TiCl}_4$  is highly challenging due to massive signal interference (strong overlap) of the La  $4p$  and the Cl  $2p$  XP signals. This prevents the determination of an accurate fitting model for the  $\text{LaOCl}$  spherical cap samples, since the individual signal features of the La  $4p$  signal (e.g., the position of the high binding energy shoulder), which depend on the exact chemical environment (e.g., the degree of surface chlorination), cannot be properly determined. However, to provide rough trends on the degree of surface chlorination, Table S1 summarizes the results of a simplified fitting approach, neglecting the La  $4p$  signal shoulder at high binding energies. Assuming that this leads to a systematic error (a systematic underestimation of the La  $4p$  signal contribution), it should still be possible to derive trends related to the Cl fraction. Again, it should be noted here that the absolute values should be considered with caution due to the aforementioned fitting issues.

57  
58  
59  
60  
61  
62  
63  
64  
65

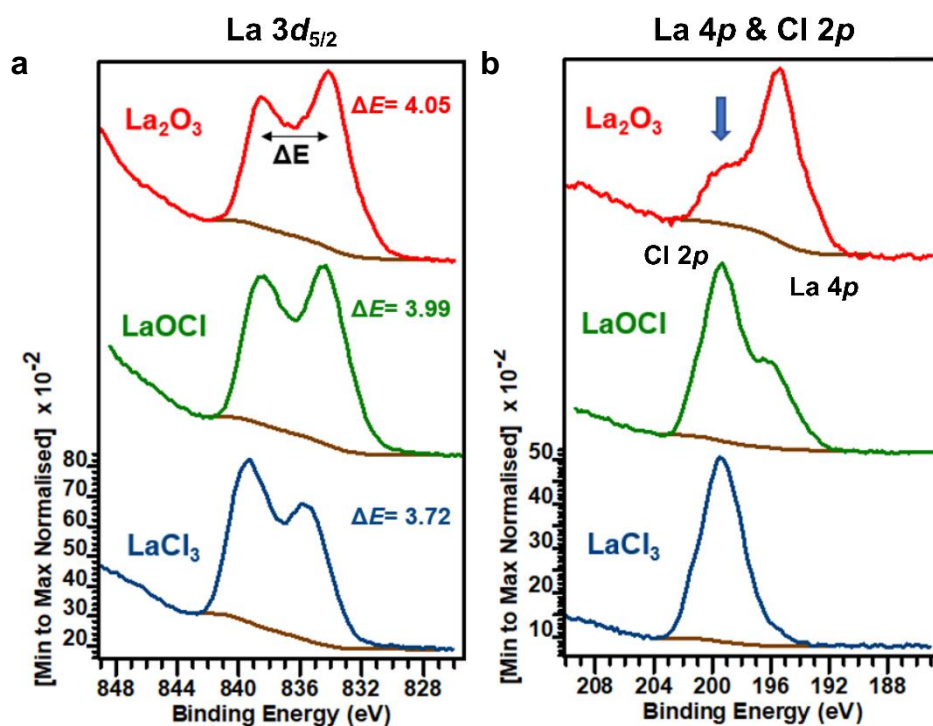

66 **Figure S1. X-ray photo-electron spectroscopy (XPS) results of three Lanthanum reference materials.** (a) The  
67 multiplet split of the La 3d<sub>5/2</sub> signals are shown for the anhydrous reference materials (La<sub>2</sub>O<sub>3</sub>, LaOCl and LaCl<sub>3</sub>)  
68 together with the split energy, ΔE, in electron volts. (b) The La 4p and Cl 2p signals of the three reference materials.  
69 The blue arrow indicates the La 4p signal shoulder at high binding energies for La<sub>2</sub>O<sub>3</sub> that overlaps with the Cl 2p  
70 signals for the chlorinated samples.

71 The La 3d<sub>5/2</sub>, La 4p and Cl 2p XPS results on the LaOCl spherical caps before (SC-P) and after (SC-  
72 Ti) treatment with TiCl<sub>4</sub> at 95 °C are given in Figure S2. As discussed earlier, the ΔE splitting value is  
73 highly sensitive to the local chemical environment and the sample preparation steps. Since ΔE is  
74 approximately the same before and after the reaction of the LaOCl spherical cap with TiCl<sub>4</sub> (4.32 eV  
75 vs. 4.30 eV respectively) and significantly lower than the multiplet split difference between the LaOCl  
76 and the LaCl<sub>3</sub> reference powders (Δ(ΔE) = 0.27 eV) and therefore the LaOCl surface of the spherical  
77 cap doesn't seem to be chlorinated further towards LaCl<sub>3</sub> upon treatment with TiCl<sub>4</sub> at 95 °C.

78 The areas of the XPS signal contributions assigned to Cl, La and Ti of the spherical cap samples are  
79 summarized in Table S1. As expected, the Ti 2p XP signal is only observed after the reaction of the  
80 LaOCl spherical caps with TiCl<sub>4</sub>. The broadening of the Ti 2p<sub>3/2</sub> signal towards lower binding energies  
81 (~456-457 eV) hints clearly towards the presence of reduced Ti<sup>3+</sup> species [2]. This could be due to a  
82 similar mechanism reported for the dissociative chemisorption of CCl<sub>4</sub> on the LaOCl surface, which

83 gives rise to a  $\text{CCl}^{\delta+}\text{-Cl}^{\delta-}$  pair coordinated to respectively the Lewis acid  $\text{La}^{3+}$  and Lewis basic  $\text{O}^{2-}$   
 84 surface groups [3,4]. However, it should be mentioned here that the majority of the Ti species remains  
 85 in the +4 oxidation state in the absence of the co-catalyst, triethylaluminium. To exclude a dominating  
 86 detrimental influence by the uncovered silicon areas on the LaOCl spherical cap sample in this  
 87 context, a Si(100) substrate reference was treated with both  $\text{TiCl}_4$  and the reducing triethylaluminium  
 88 co-catalyst and subsequently analyzed with XPS. The corresponding Ti 2p signal is shown in blue in  
 89 Figure S2c (denoted as Si-Ti/Al). For the Si-Ti/Al reference, the presence of reduced Ti species can  
 90 also be observed, which can be attributed to the interaction with the reducing co-catalyst. However,  
 91 the fraction of the reduced signal contributions is 3.4 times for the LaOCl SC-Ti sample than for the Si-  
 92 Ti/Al reference. Therefore, the reduced Ti species can be mainly attributed to interactions with the  
 93 LaOCl spherical caps.

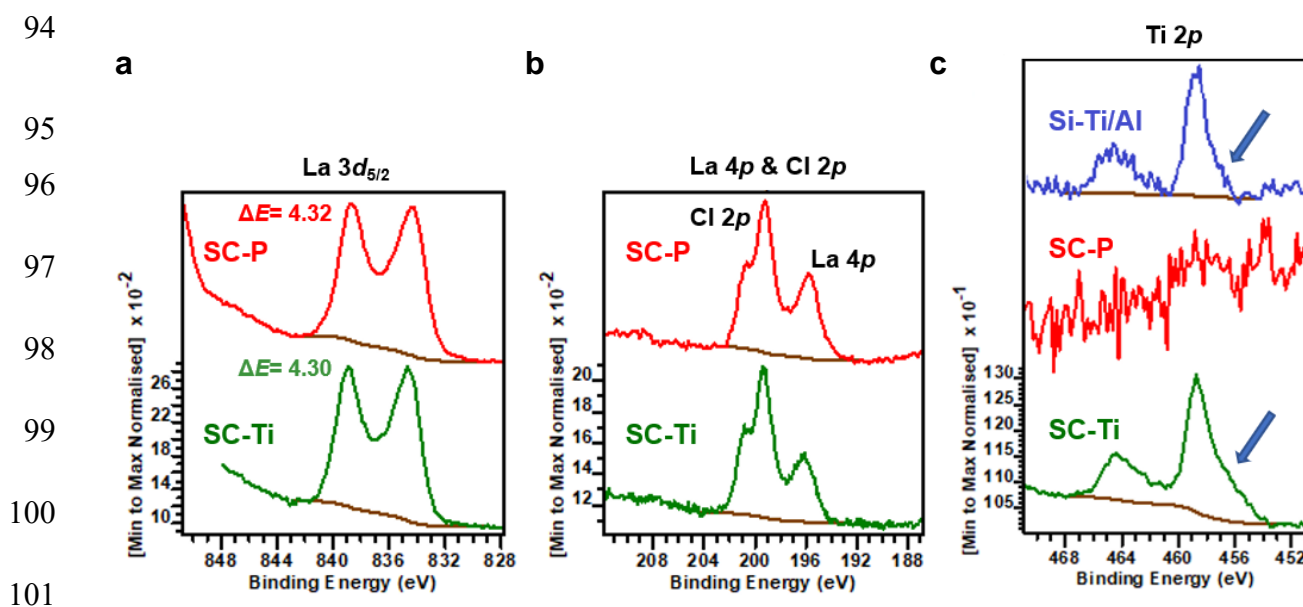

102 **Figure S2. X-ray photo-electron spectroscopy (XPS) results of the LaOCl spherical cap model system before**  
 103 **and after reaction with  $\text{TiCl}_4$ .** (a) The multiplet split of the La  $3d_{5/2}$  spectrum is given for the LaOCl spherical cap  
 104 model system before (SC-P, red) and after (SC-Ti, green) reaction with  $\text{TiCl}_4$ . (b) The La  $4p$  and Cl  $2p$  spectra of  
 105 SC-P and SC-Ti. (c) The Ti  $2p$  spectrum of SC-P, SC-Ti and Si-Ti/Al (blue). The blue arrows show the presence of  
 106 reduced  $\text{Ti}^{x+}$  species.

107 The ratios of Cl:La-related signals (Cl  $2p$ :La  $3d_{5/2}$  and Cl  $2p$ :La  $4p$ ) of the pristine SC-P sample are  
 108 slightly higher than those of the LaOCl reference, but considerably lower than those of the pure  $\text{LaCl}_3$   
 109 reference. The slight deviation from the LaOCl reference might be caused by topography-related

110 effects and the different sample geometry (spherical caps versus powder references). However, after  
 111 reaction with  $\text{TiCl}_4$  the Cl:La ratios increase significantly. Here, due to massive signal interference, it is  
 112 not entirely clear, whether this is due to a further chlorination of LaOCl towards  $\text{LaCl}_3$  with  $\text{TiCl}_4$  acting  
 113 as the chlorination reagent or simply due to the chemisorption of  $\text{TiCl}_x$  species on the external surface  
 114 of LaOCl. Since the La  $3d_{5/2}$  splitting value is not affected by the reaction with  $\text{TiCl}_4$  as mentioned  
 115 earlier, it seems more likely that the increased ratio of the Cl:La peaks is due to the chemisorption of  
 116  $\text{TiCl}_x$  species.

117 **Table S1. The area under the selected La, Cl and Ti XP signals and the respective signal ratios.** Values are  
 118 given for the three reference materials  $\text{La}_2\text{O}_3$ , LaOCl and  $\text{LaCl}_3$  as well as the pristine and  $\text{TiCl}_4$  treated LaOCl  
 119 spherical cap systems called SC-P and SC-Ti, respectively.

| Sample                  | Area<br>La $3d_{5/2}$ | Area<br>La $4p^*$ | Area<br>Cl $2p$ | Area<br>Ti $2p$ | Ratio<br>Cl $2p$ : La $3d_{5/2}$ | Ratio<br>Cl $2p$ : La $4p$ | Ratio<br>Cl $2p$ : Ti $2p$ |
|-------------------------|-----------------------|-------------------|-----------------|-----------------|----------------------------------|----------------------------|----------------------------|
| $\text{La}_2\text{O}_3$ | 232.3                 | 364.2             | -               | -               | -                                | -                          | -                          |
| LaOCl                   | 269.2                 | 406.1             | 337.5           | -               | 1.3                              | 0.8                        | -                          |
| $\text{LaCl}_3$         | 168.3                 | 185.0             | 525.1           | -               | 3.1                              | 2.8                        | -                          |
| SC-P                    | 65.7                  | 103.6             | 104.4           | 0.0             | 1.6                              | 1.0                        | -                          |
| SC-Ti                   | 38.2                  | 61.2              | 79.9            | 81.8            | 2.1                              | 1.3                        | 1.0                        |

120 \* The area under the La  $4p$  is obtained using a single signal (GL(30) line shape) and doesn't take the  
 121 high binding energy shoulder observed around 200 eV into account.

122

123

## 124 2. Raman Micro-Spectroscopy

125

126 In Figure S3, the Raman spectra are given for the pristine LaOCl spherical cap, the Si (100) wafer  
 127 background and the LaOCl powder reference material also used as the XPS reference. For the  
 128 spherical cap model system, only the LaOCl chemical phase is detected. Conventional Raman micro-  
 129 spectroscopy (e.g., in the absence of surface-enhancement techniques) is a bulk-probing technique  
 130 that nicely complements the surface-sensitivity of XPS analysis in this scenario to study the spherical  
 131 cap model system.

132

133

134

135

136

137

138

139

140

141

142

143

144

145

146

147

148

149

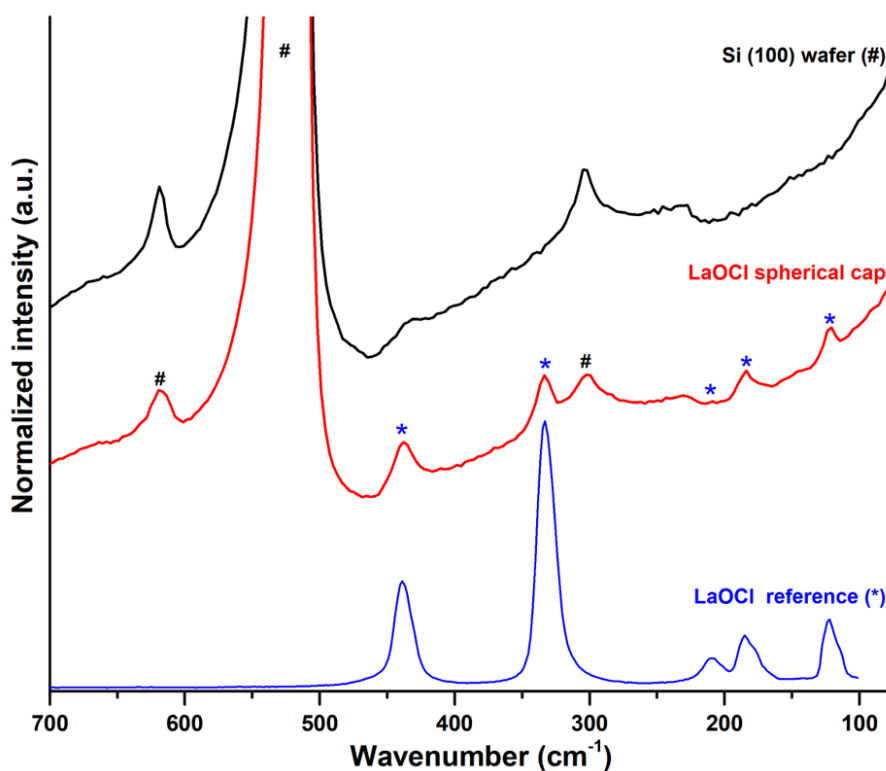

150

151

152

153

154

**Figure S3. Raman micro-spectroscopy to determine the bulk chemical phase of the LaOCl spherical cap model system.** In blue and black, the Raman spectra are given for respectively the LaOCl powder reference that was also used for XPS studies and a clean Si(100) wafer substrate. In red, the Raman spectrum is given for the LaOCl spherical cap model system, where the stars denote peaks belonging to the LaOCl chemical phase based on the blue spectrum and the octothorp denotes peaks belonging to the Si(100) wafer substrate.

155

156

157

158

159

160

161

162

163

164

165

In Figure S4, the Raman spectra are given for the LaOCl spherical caps after specified (0,1,2,5,10,20 and 60) min of ethylene polymerization, as well as the Si (100) wafer background on the 20 min ethylene polymerized sample, a pristine LaOCl spherical cap (without  $\text{TiCl}_4$ ) but with TEAL after 60 min of ethylene polymerization and a HDPE reference film. All Raman spectra are normalized to the  $521 \text{ cm}^{-1}$  peak of the Si (100) substrate, which can be regarded as an internal standard. For all samples, the measured spot was optimized based on that part of the spherical cap that gave the most intense polyethylene signal. For all LaOCl/ $\text{TiCl}_4$ /TEAL ethylene polymerized samples, Raman micro-spectroscopy confirms that polyethylene is formed mainly on the LaOCl spherical caps, with no observable amount detected on the background substrate and no polyethylene or other carbon phases are found on the pristine sample (0 min PE). The LaOCl/TEAL sample without  $\text{TiCl}_4$  treatment and after 60 min of ethylene polymerization showed no formation of polyethylene.

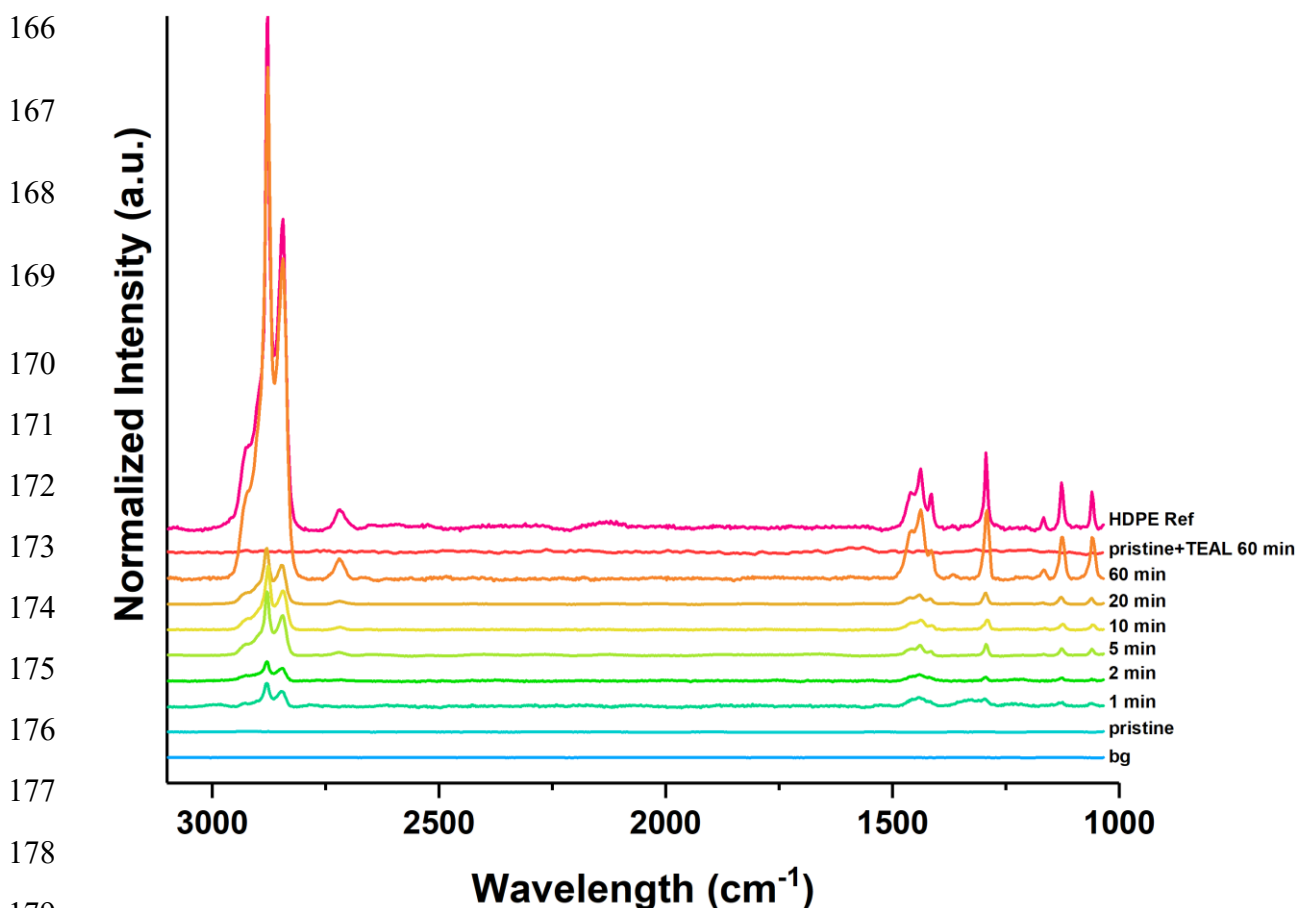

180 **Figure S4. Raman spectra taken after different ethylene polymerization times on the LaOCl spherical caps**  
 181 **as well as a HDPE reference film.** Raman spectra are given from the pristine up to 60 min of ethylene  
 182 polymerization on the LaOCl spherical cap model system (labelled as *x min PE*) as well as the Si (100) background  
 183 of the 20 min ethylene polymerized sample (background 20 min PE), a pristine LaOCl spherical cap (without TiCl<sub>4</sub>)  
 184 but with TEAL after 60 min of ethylene polymerization and a HDPE reference film. In all cases, normalization was  
 185 performed using the Si (100) background 521 cm<sup>-1</sup> peak as an internal standard.

186 The strength of Raman micro-spectroscopy is the ability to differentiate and map chemical phases  
 187 over the region of interest. In this case, it allows us to visualize the distribution of polyethylene on the  
 188 LaOCl spherical caps at different polymerization times. In Figure S5, the Raman micro-spectroscopy  
 189 maps of the 2700-3100 cm<sup>-1</sup> are given, which visualize the asymmetric and symmetric -CH<sub>2</sub>- stretching  
 190 modes of polyethylene. Unlike the normalized spectra in Figure S4, using the Si(100) 512 cm<sup>-1</sup>  
 191 substrate peak, these maps aren't normalized since this internal standard vibration fell outside of the  
 192 imaged region. The inset in each Raman micro-spectroscopy map is the correlated optical microscopy  
 193 image that shows the contours of the LaOCl spherical caps imaged. As shown in Figure S5, the  
 194 pristine sample shows no detectable formation of polyethylene or other carbon phase with -CH<sub>2</sub>-

195 groups that would fall in the same imaged region. Starting at the 1 min ethylene polymerized sample,  
196 we mainly observe polyethylene fibres distributed on the centre of the spherical cap with a few  
197 hotspots at the edge. The next samples, going from 2 min to 20 min ethylene polymerization, continue  
198 the trend with the formation of a polyethylene fibre network in the centre of the spherical caps and the  
199 formation of dense polyethylene regions around the edges. For both the 10 and 20 min ethylene  
200 polymerization samples, dense regions also start to appear in the centre of the spherical caps. Finally,  
201 the 60 min ethylene polymerization sample still shows some polyethylene fibres on top of the spherical  
202 cap but the dense regions have grown significantly enough in size to almost fully cover the spherical  
203 cap. For the 5, 20 and 60 min ethylene polymerized imaged spherical caps long polyethylene fibres  
204 spanning over 10 microns in length can be observed to grow away from the spherical cap and lay on  
205 the Si (100) substrate background.

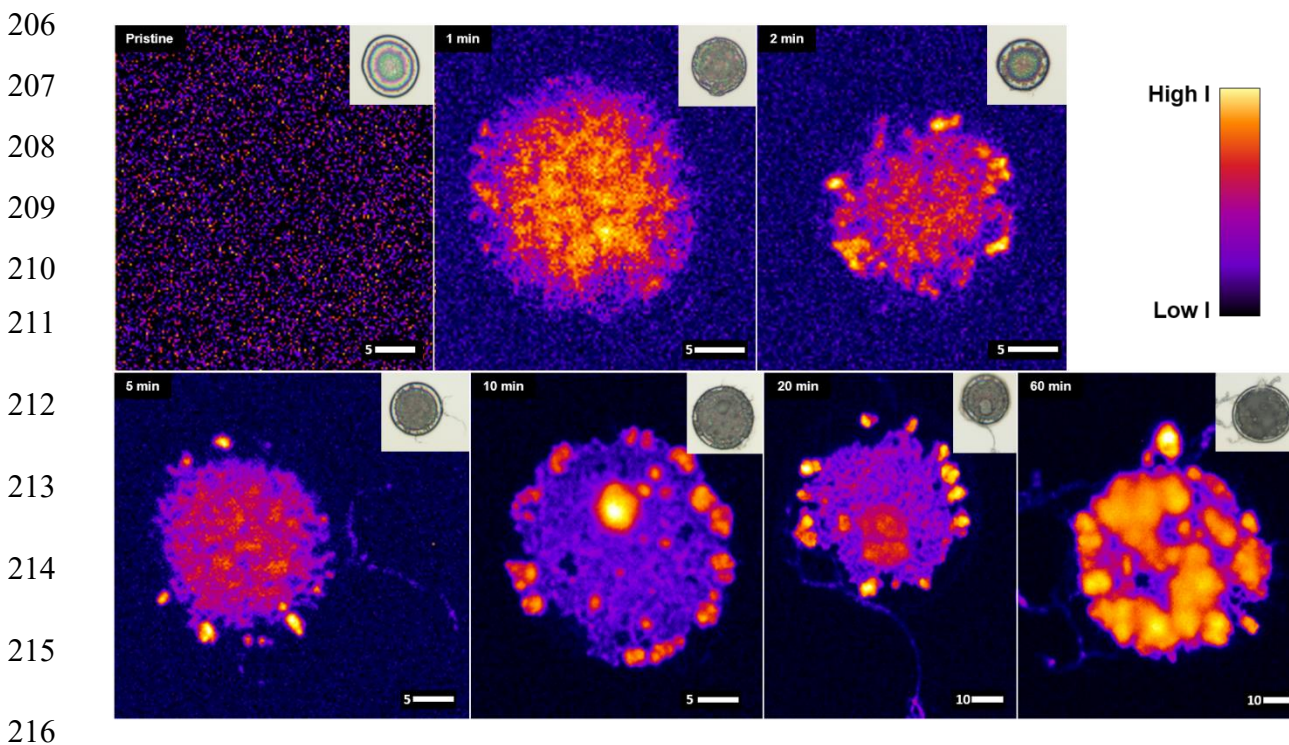

217 **Figure S5. Raman micro-spectroscopy maps of the 2700-3100 cm<sup>-1</sup> region on different ethylene**  
218 **polymerization times.** The 2700-3100 cm<sup>-1</sup> region imaged for each ethylene polymerization time shows the  
219 distribution of the asymmetric and symmetric -CH<sub>2</sub>- stretching modes of polyethylene on a LaOCl spherical cap.  
220 The inset images show the correlated optical microscopy overview of the pristine and ethylene polymerized LaOCl  
221 spherical caps. The scale bars depict the size in microns.



222 In Figure S6 the Raman spectra are given for the pristine and ethylene polymerized reference  
223 MgO/MgCl<sub>2</sub> caps. Starting with the 2 min ethylene polymerized sample, the polyethylene characteristic  
224 peaks, especially around 2700-2900 cm<sup>-1</sup> are clearly visible.

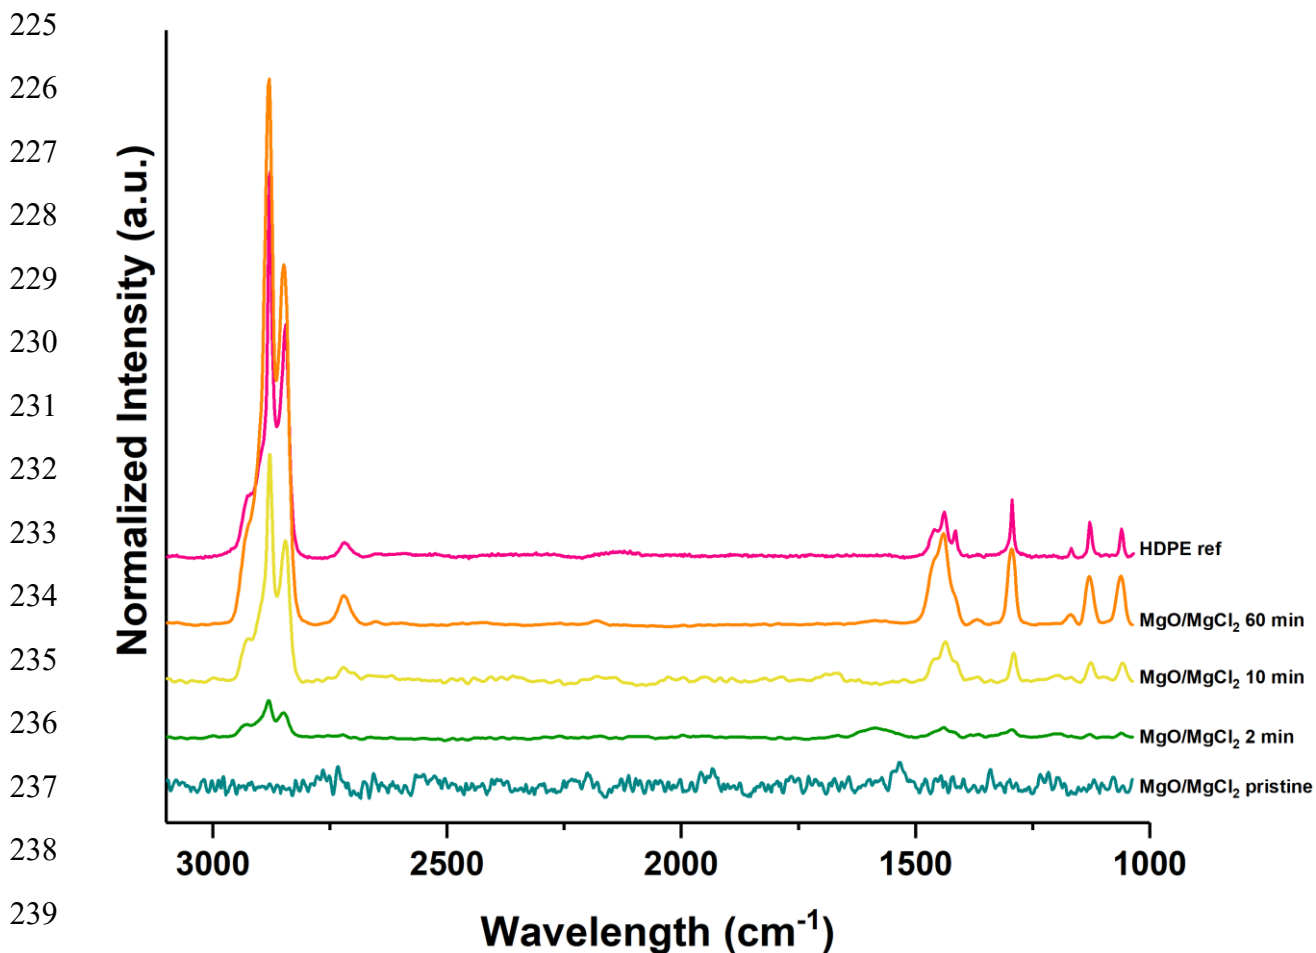

241 **Figure S6. Raman spectra taken after different ethylene polymerization times on the reference MgO/MgCl<sub>2</sub>**  
242 **caps as well as a HDPE reference film.** Raman spectra are given from the pristine up to 60 min of ethylene  
243 polymerization on the reference MgO/MgCl<sub>2</sub> cap samples (labelled as *MgO/MgCl<sub>2</sub> X min*) and a HDPE reference  
244 film. In all cases, normalization was performed using the Si (100) background 521 cm<sup>-1</sup> peak as an internal standard.

245

246 In Figure S7 the Raman maps are given of the 2, 10 and 60 min ethylene polymerized reference  
247 MgO/MgCl<sub>2</sub> caps. The 2700-3100 cm<sup>-1</sup> region is portrayed that visualizes the asymmetric and symmetric  
248 -CH<sub>2</sub>- stretching modes of polyethylene. Whereas only a weak signal for polyethylene is observed for  
249 the 2 min polymerized sample, which is in agreement with the spectrum given in Figure S6, strong  
250 signals are observed for both the 10 and 60 min polymerized samples. Furthermore, whereas for LaOCl

251 spherical caps both small yet intense spheroidal regions are observed and a fibre-like weaker intensity  
252 region, for the MgO/MgCl<sub>2</sub> samples a more homogeneous polyethylene phase is observed of strong  
253 intensity.

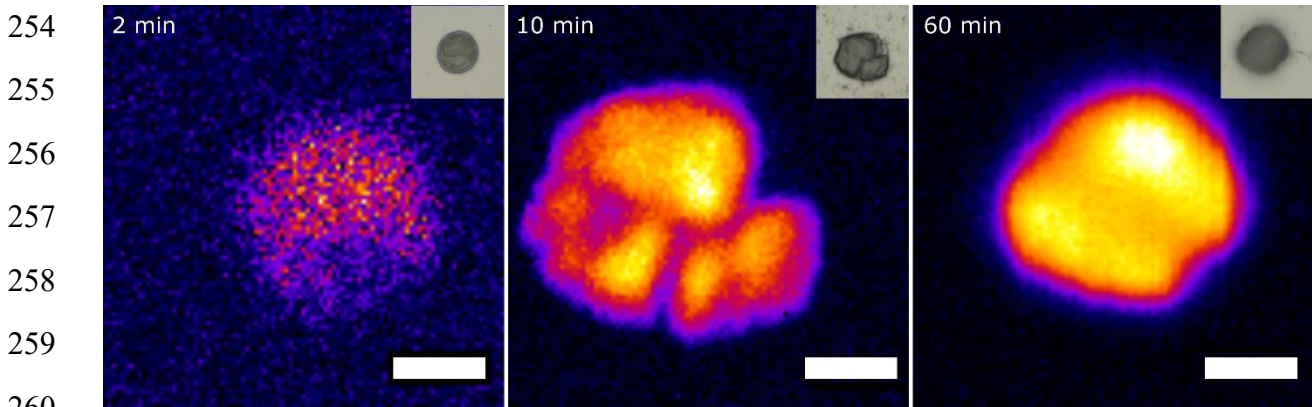

261 **Figure S7. Raman micro-spectroscopy maps of the 2700-3100 cm<sup>-1</sup> region on different ethylene**  
262 **polymerization times of the reference MgO/MgCl<sub>2</sub> caps.** The 2700-3100 cm<sup>-1</sup> region imaged for each ethylene  
263 polymerization time shows the distribution of the asymmetric and symmetric -CH<sub>2</sub>- stretching modes of polyethylene  
264 on a LaOCl spherical cap. The inset images show the correlated optical microscopy overview of the 2, 10 and 60  
265 min ethylene polymerized MgO/MgCl<sub>2</sub> caps. The scale bars depict the size in microns.

### 266 3. Time-of-Flight Secondary Ion Mass Spectrometry

267 The mass spectra obtained from the imaged region are the convolution of the spherical caps and the  
268 Si(100) substrate. Therefore, to study if the charged mass fragments (called secondary ions)  
269 originating from the spherical caps, a region of interest (ROI) was drawn inside the analysis software  
270 on top of the spherical caps. The resulting mass spectra of both this spherical cap ROI and the inverse  
271 ROI that represents the Si(100) substrate, are given in Figure S8a as well as the insets that show the  
272 drawn ROIs. Additionally, the first few sputter seconds were typically disregarded from the analysis, as  
273 shown in Figure S8b, due to the presence of adsorbed carbon species from the air that are removed in  
274 these first few sputter cycles. The cut-off was based on reaching a stable intensity profile for the *m/z*  
275 species.

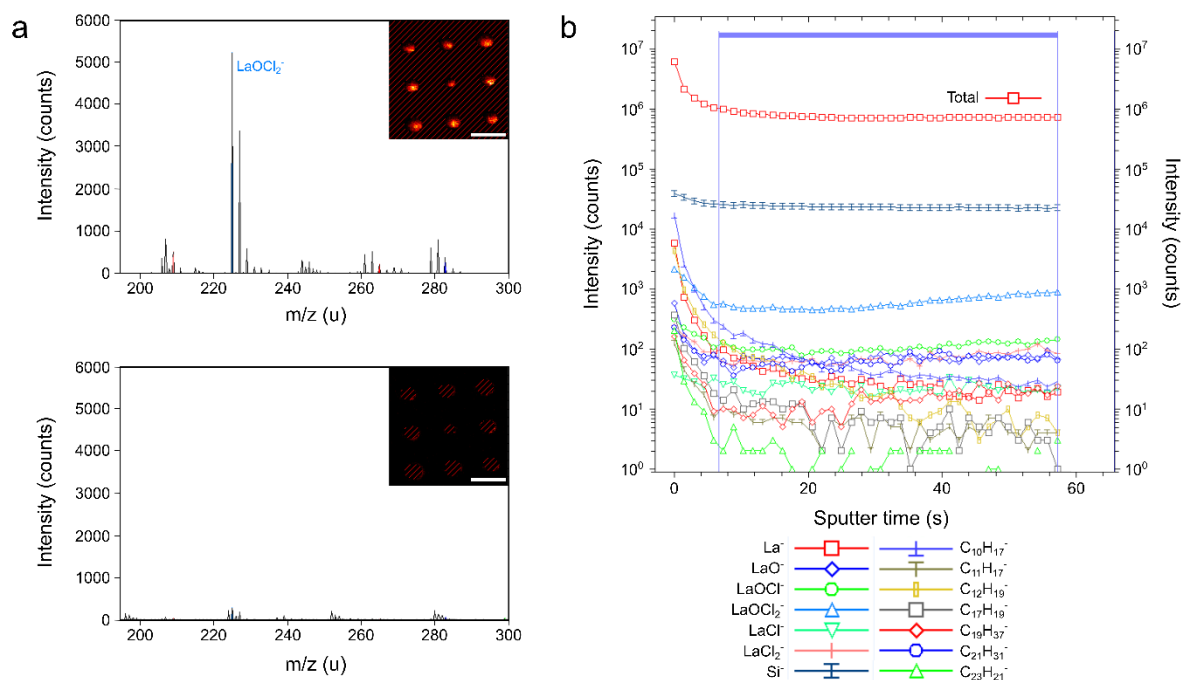

276  
 277 **Figure S8. Time-of-Flight Secondary Ion Mass Spectrometry (ToF-SIMS) data and sputter profile explaining**  
 278 **the chosen ROIs.** (a) Mass spectra of the spherical cap model catalyst after 20 min polymerization time (inset map)  
 279 recorded with ToF-SIMS. A ROI was picked selecting only the spherical caps, removing non-relevant mass  
 280 fragments from the analysis. The ROI (top spectrum, all unmarked area in the inset map) contains the majority of  
 281 the catalyst ( $\text{LaOCl}_2^+$  indicated) and PE (repeating unit) compared to the substrate (bottom spectrum). (b) To avoid  
 282 the interference of surface adsorbed species from the analysis, a z-ROI was chosen after the initial exponential  
 283 increase/decrease of the organic fragments passed.

284 A selection of mass fragments is shown in Figure S9. Based on the ion generated SE images, the  
 285 polyethylene phase can be clearly distinguished from the  $\text{LaOCl}$  spherical caps. It should be  
 286 mentioned here that the ion counts for the  $\text{LaOCl}^+$  fragment is typically orders of magnitude higher than  
 287 for polyethylene fragments such as  $\text{C}_9\text{H}_{13}^+$ . This may be related to charging effects and the low  
 288 ionisation probability of polyolefins, making them particularly challenging to be measured with ToF-  
 289 SIMS. Additionally, the sample geometry (spherical caps with rough surfaces after polymerization  
 290 instead of planar systems) could also cause adverse effects here. The  $\text{C}_9\text{H}_{13}^+$  mass fragment was  
 291 chosen here to represent the polyethylene phase as based on the work by Kern *et al.* [5]. This  
 292 polyethylene mass fragment is also found for the pristine sample, but with considerably lower ion  
 293 counts or intensity and is thus more likely to be from adventitious carbon due to air exposure of the  
 294 samples. Nevertheless, as is mostly visible for the 2 and 10 min maps, the  $\text{C}_9\text{H}_{13}^+$  mass charge  
 295 fragment shows strong correlation with the polyethylene phase visible in the SE images.

296 The integrated intensity for this fragment, found in the different mass spectra, is plotted in Figure S10.  
297 As the polymerization time increases, more of this fragment is found (note that all measurement points  
298 have the same sputter time) until after 10 min a saturation effect starts to appear. This is in line with  
299 the AFM analysis performed in Figures S11-13, where the polyethylene volume on the external  
300 surface of the LaOCl spherical caps was estimated for different ethylene polymerization times and  
301 showed a saturation of the estimated polyethylene volume at intermediate polymerization times. This  
302 could be explained by a mass transfer limitation effect occurring at such intermediate polymerization  
303 times, where the fragmentation rate is not sufficiently high yet to facilitate high enough diffusion of  
304 ethylene monomers to the active sites within the spherical cap composite phase and hence a decline  
305 in the polymerization rate is observed.

306

307

308

309

310

311

312

313

314

315

316

317

318

319

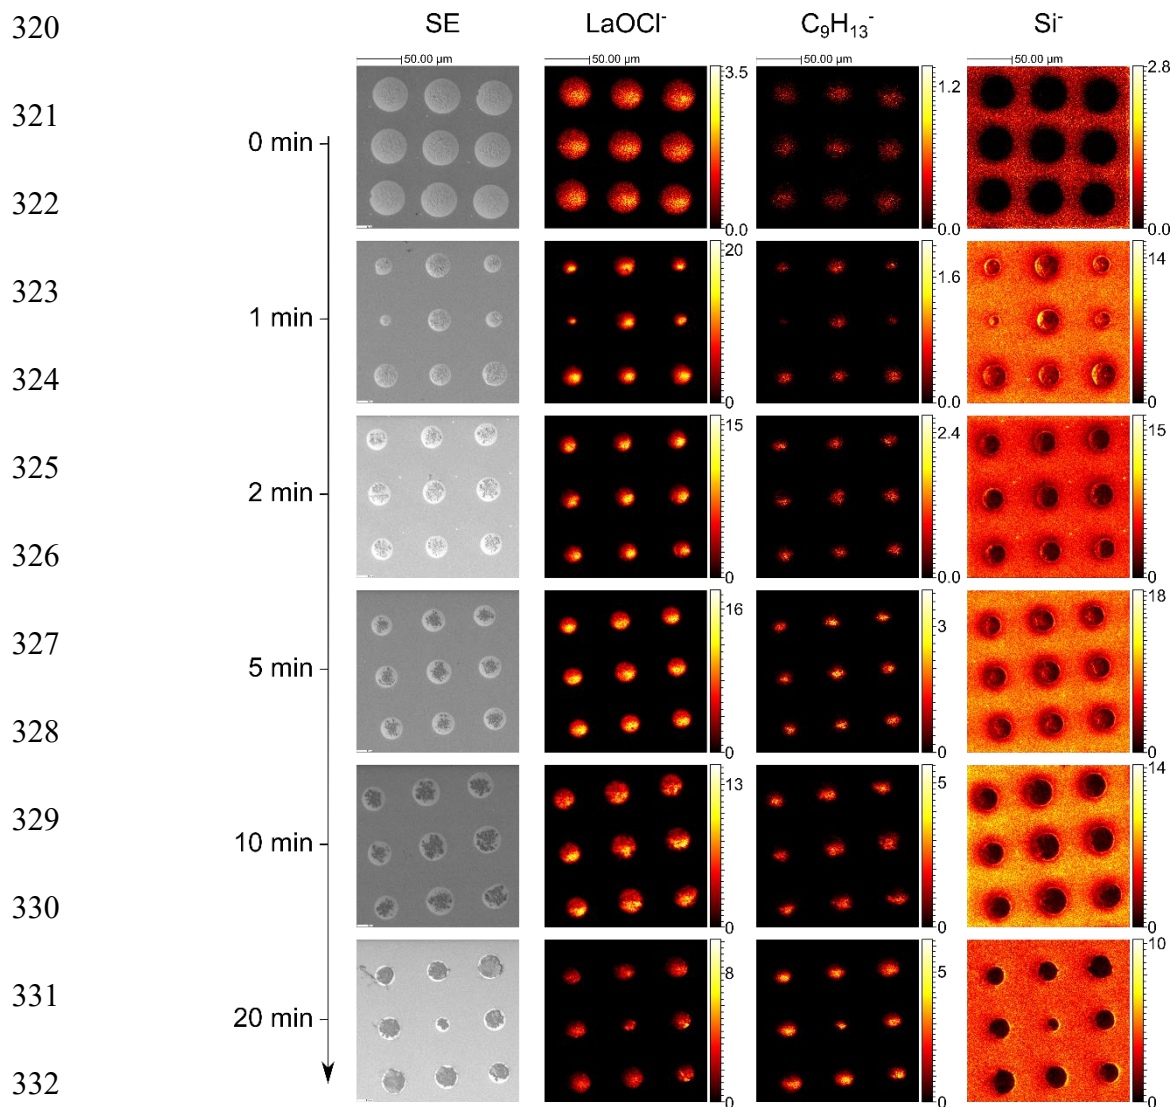

333 **Figure S9. Time-of-flight secondary ion mass spectrometry (ToF-SIMS) secondary electron (SE) images,**  
 334 **complemented by a selection of mass fragments, for different times of ethylene polymerization.** The LaOCl<sup>-</sup>  
 335 fragment is chosen to represent the polymerization catalyst, while the C<sub>9</sub>H<sub>13</sub><sup>-</sup> fragment is representing the  
 336 polyethylene. The Si<sup>-</sup> fragment is shown to highlight the substrate on which the spherical caps were synthesized,  
 337 and emphasizes that the LaOCl is only present in the patterned area as intended during the synthesis.

338  
 339  
 340  
 341  
 342  
 343  
 344  
 345

346  
347  
348  
349  
350  
351  
352  
353  
354  
355  
356

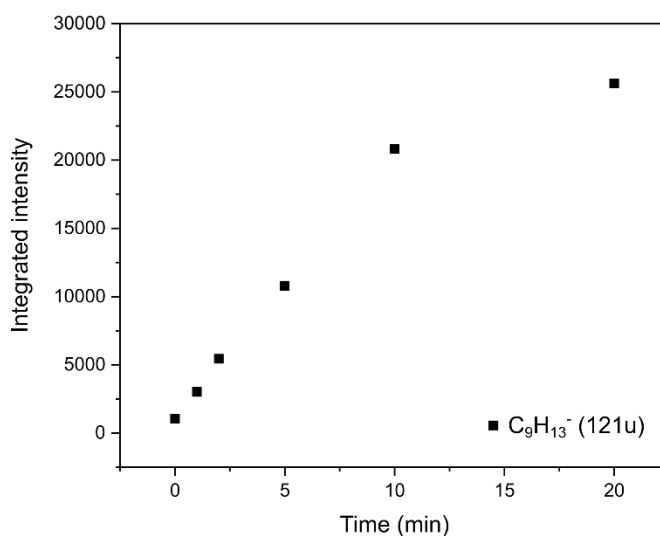

357 **Figure S10. Integrated area of the  $C_9H_{13}^-$  mass fragment.** Representing polyethylene, the integrated area of the  
358  $C_9H_{13}^-$  mass fragment ( $m/z = 121$  u), also shown in the mass images in Figure S9, is shown after increasing times  
359 of ethylene polymerization. Whereas first a linear increase is found, the integrated intensity starts to flatten out after  
360 roughly 20 min of ethylene polymerization. This indicates that the surface coverage of each island increases until a  
361 nearly full surface coverage is obtained.

362

#### 363 4. Scanning Probe Microscopy

364 Atomic Force Microscopy (AFM) was used to investigate the topological and morphological evolution  
365 of the LaOCl spherical caps as a function of ethylene polymerization time. Figure S11 shows the  
366 topological images of 6 LaOCl spherical caps per ethylene polymerization time. The height contrast is  
367 set to be identical for the 0 to 20 min of polymerization time at a 0-1 $\mu$ m range. However, the ethylene  
368 polymerized LaOCl spherical caps of the 60 min sample were considerably thicker on average and  
369 therefore required a different height contrast as shown ranging from 0-4  $\mu$ m. Purely based on the  
370 topological information provided by AFM it becomes clear that these LaOCl spherical caps become  
371 covered with polyethylene fibers of varying lengths already at ethylene polymerization times as early  
372 as 1 min. With an increase of polymerization times, thicker blobs of polyethylene start to appear (dark  
373 purple in color). It should be noted here that due to the different height scale bar in the 60 min sample,  
374 large features may appear to have a lighter (green-blue) color, which would have appeared dark  
375 purple with the height contrast used for the 0-20 min samples.

376 However, using purely the height of the polymer features itself isn't accurate enough to describe the  
377 polymer yield per polymerization time, as the patterns can vary in shape (diameter or height) even  
378 within the same wafer substrate. Instead, our approach to attempt to track the polymerization yield as  
379 a function of time is shown in Figure S12. The individual micrographs were first flattened on the  
380 background (substrate) and then x and y cross-sectional profiles were taken from the background  
381 through the center of the spherical caps. From the resulting line profiles, the height ( $h$ ) and cap base  
382 radius ( $a$ ) were measured by fitting the visible parts of uncovered catalyst with a power function. From  
383 these values the catalyst caps volumes were approximated with the following equation 3:

$$384 \quad V = \pi \cdot h \left( a^{\frac{1}{4}} + h^{\frac{1}{3}} \right) \quad (3)$$

385 where  $V$  is the cap volume in  $\mu\text{m}^3$ ,  $h$  is the height of the cap in  $\mu\text{m}$  and  $a$  is the cap base radius, or  
386 chord length, in  $\mu\text{m}$  [6]. It should be said here that this approach does not allow us to quantify the  
387 amount of polyethylene present within the spherical cap. For such an approach, X-ray  
388 nanotomography techniques, such as ptychography X-ray computed tomography as done in our  
389 previous works could offer a solution [7,8].

390

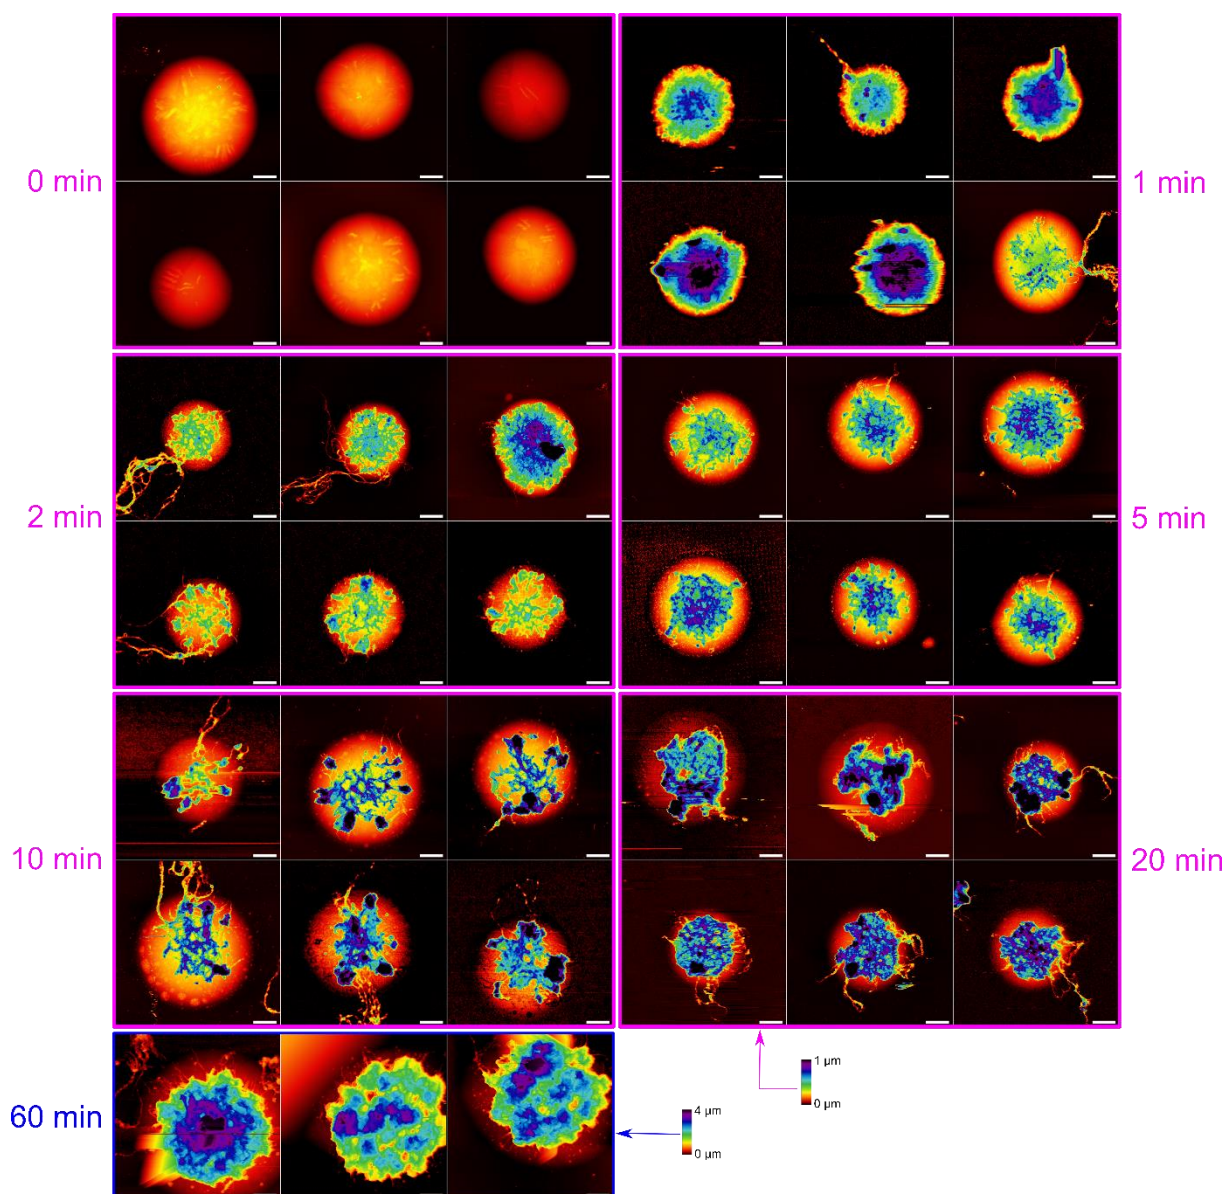

391  
 392  
 393 **Figure S11. Atomic Force Microscopy (AFM) on individual catalyst caps after different ethylene**  
 394 **polymerization times.** Six LaOCl spherical caps were scanned per ethylene polymerization time, all shown using  
 395 a z contrast of 1  $\mu\text{m}$ , with the exception of 60 min, where only 3 viable micrographs could be obtained shown with  
 396 a z contrast of 4  $\mu\text{m}$  due to the excessive thickness of the polymer features which were too challenging for our  
 397 scanning probe microscopy system. A general trend shows that the coverage and thickness of the formed polymer  
 398 increase with increasing ethylene polymerization time. Furthermore, with the exception of 60 min, the edges of the  
 399 patterned catalyst caps remain fairly visible whereas the centre part of the cap gets covered by PE strings and  
 400 larger features. Notes: i) At 2 min, top-right; the catalyst consisted of a non-spherical shape. ii) 5 min, bottom-left;  
 401 the catalyst was measured before by SEM analysis (explaining the grid-like background) iii) 10 min, top-left and  
 402 bottom-right; some noise was found only on the background, not on the formed PE. White scale bars are 5  $\mu\text{m}$ .



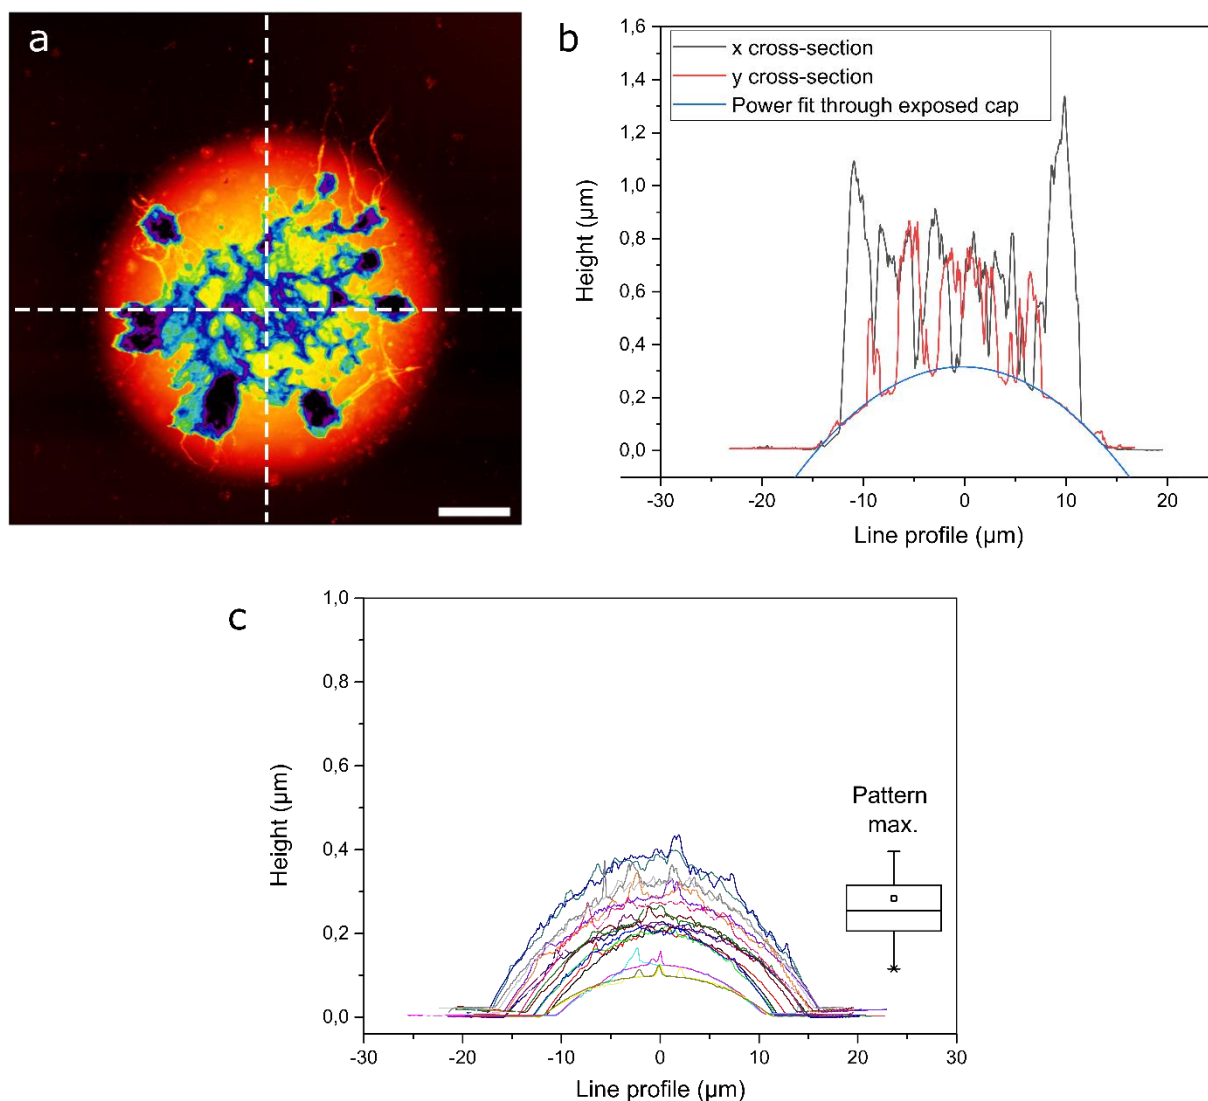

404  
 405 **Figure S12. Estimation of the LaOCl spherical cap volume after ethylene polymerization and for the pristine**  
 406 **hemispherical caps.** A) The individual micrographs shown in Figure S11 were each flattened on their background  
 407 (substrate) around the LaOCl spherical cap and polyethylene, shown here as example after 10 min polymerization  
 408 (Figure S11, 10 min, center-top spot). B) Then, a x and y cross-section was taken and the resulting height profiles  
 409 were fitted with a power function over the exposed polymer-free catalyst surface. Using the software measurement  
 410 tools, the cap base radius or chord length and catalyst height were measured. These were then used to estimate  
 411 the volume of the catalyst, which could subsequently be subtracted from the total volume obtained in the micrograph  
 412 (above the background height) to result in a net volume of polyethylene. C) To show that the patterned catalyst  
 413 indeed consist of hemispherical caps, not i.e. pancake- or disc shapes, and thus can be fitted with a power function,  
 414 the cross section of all the measured pristine caps (for both Figure S11 and S13) are shown together with a box  
 415 chart showing their maximum height.

416 The total volume of all features measured, which represents the LaOCl spherical cap and polyethylene  
417 phases, minus the estimated volume of the sole LaOCl spherical cap as described above, results in  
418 the estimated volume of polyethylene (per micrograph). This volume was plotted in Figure S13 for all  
419 micrographs recorded as shown in Figure S11, and for all full micrographs recorded with PiFM as  
420 shown in Figure S15 (*vide infra*), to visualize the increase of polyethylene over time ignoring the initial  
421 pore volume of the catalyst which might be filled up at the early stages.

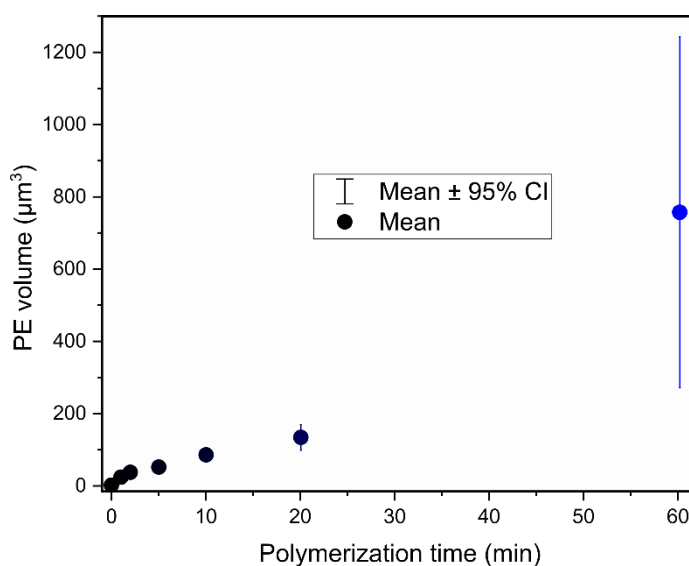

433 **Figure S13. Mean volume of the polyethylene phase (PE) measured on the external LaOCl spherical caps**  
434 **as a function of ethylene polymerization time.** The mean volume of the polyethylene phase growing on the  
435 external LaOCl spherical cap surface was calculated using the micrographs of Figure S11 and correction for the  
436 estimated volume of the LaOCl catalyst framework as discussed in Figure S12.

437  
438 In Figure S14 the extreme sensitivity of the MgO/MgCl<sub>2</sub> caps to moisture is visualized with a time-laps  
439 series of AFM measurements. It is due to the typically rough shapes observed for these MgO/MgCl<sub>2</sub>  
440 samples that we have decided to refer to them simply as caps as they don't resemble spherical caps as  
441 is the case for LaOCl. This seems to be caused by both the transformation step of Mg(NO<sub>3</sub>)<sub>2</sub> x H<sub>2</sub>O to  
442 MgO and the subsequent partial chlorination with TiCl<sub>4</sub> to MgO/MgCl<sub>2</sub>. The first AFM measurement on  
443 the left was obtained with the use of an AFM operating inside a glovebox at <1 ppm O<sub>2</sub> and H<sub>2</sub>O values  
444 whereas the subsequent two measurements were obtained with an AFM operating under ambient  
445 conditions after exposure times of respectively 15 and 35 min to moisture. All images were collected

446 with the same type of AFM apparatus and cantilevers as described in the methodology section. The line  
447 profile of each image obtained at the same X,Y positions shows a dramatic change in the morphology  
448 of the cap over time. Not only does the overall height of the cap collapse from almost 1.2 microns at the  
449 peak towards 0.8 microns, the minimum observed at a line profile position of 0  $\mu\text{m}$  (X-axis of the plot)  
450 also changes. Interestingly, this value changes from almost 0  $\mu\text{m}$  in height under controlled atmosphere  
451 to 0.4  $\mu\text{m}$  in height after 15 min exposure and back to 0.2  $\mu\text{m}$  in height after 35 min. This shows that the  
452 hydration and subsequent morphological changes induced on the MgO/MgCl<sub>2</sub> framework can be a  
453 rather slow process. Additionally, due to the severe morphological changes, care has to be taken  
454 especially when analyzing the pristine MgO/MgCl<sub>2</sub> caps or at low polymerization times when there is still  
455 a large exposed surface of MgO/MgCl<sub>2</sub>.

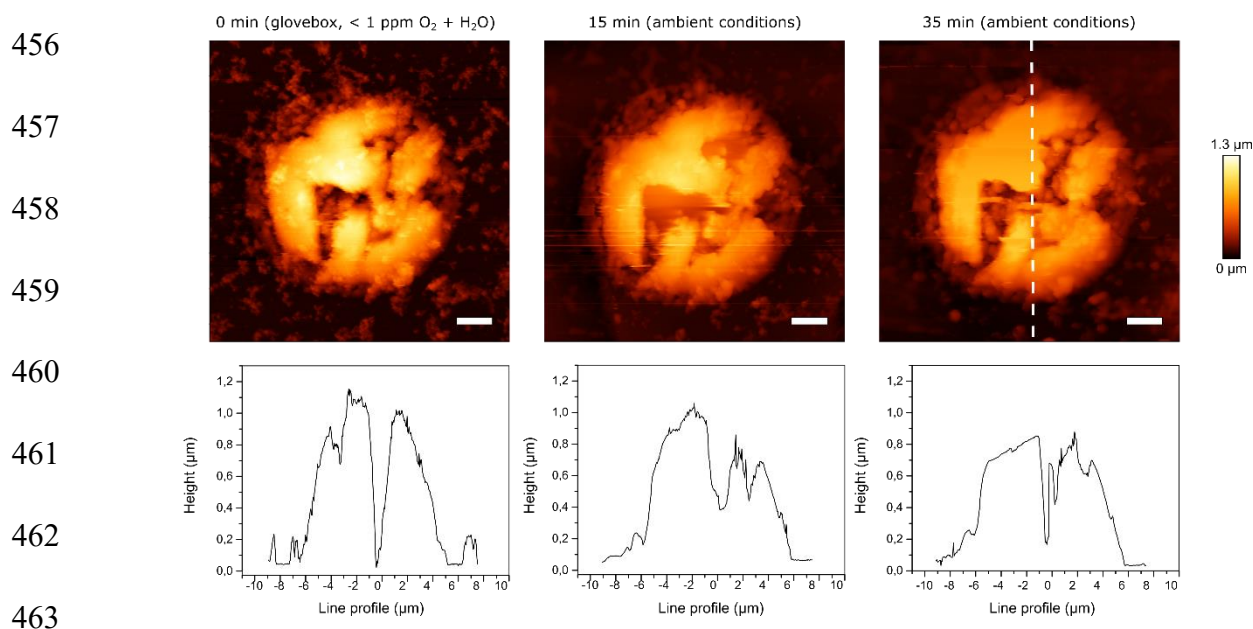

464 **Figure S14. Time-laps AFM results on a single pristine MgO/MgCl<sub>2</sub> cap before (AFM positioned inside a**  
465 **glovebox operating at <1 ppm O<sub>2</sub> and H<sub>2</sub>O) and after (AFM operating under ambient conditions) exposure**  
466 **to moisture.** Additionally, on the bottom row the line profiles are provided going on the same position of each cap  
467 as shown via the dashed white line.

468

469 Going from 0-20 min ethylene polymerization a saturation effect of the polyethylene volume growing  
470 on the external surface of the LaOCl spherical cap is observed. This could be explained by first the  
471 formation of many extruded polyethylene fibres at early polymerization times as well as the filling of  
472 the internal pore network of the LaOCl spherical cap. As the internal pore network becomes filled with

473 a polyethylene phase that can't be assessed with this approach (since AFM only measured topological  
474 information and not internal), these extruded polyethylene fibres will show a non-linear decaying  
475 growth rate due to mass transfer limitations. This is because new ethylene monomers will now have to  
476 diffuse through a dense polyethylene phase within the internal pore network to reach the active sites.  
477 However, at 60 min of ethylene polymerization a drastic change is observed with a considerably higher  
478 average external polyethylene volume when compared to the 5-20 min samples. This sudden large  
479 increase of the 60 min sample corresponds well to the FIB-SEM observations that the internal LaOCl  
480 spherical cap has been completely disintegrated into small fragments dispersed well within the  
481 polyethylene phase, whereas for the 5-20 min samples most of the internal LaOCl framework was still  
482 intact, albeit with many crack lines and increasing amount of fragments observed. Therefore, the 60  
483 min sample is expected to experience less mass transfer limitations due to the fragmentation of the  
484 framework, which is a necessary phenomenon to ensure polymerization activity [9,10].

485 In Figure S15 the micrographs recorded with PiFM are shown per PE time; 0 min shows a full  
486 spherical cap and the corresponding  $1600\text{ cm}^{-1}$  signal, which most likely belongs to the C=O stretching  
487 vibration of surface absorbed carbonate species [11,12]. Interestingly, the  $1600\text{ cm}^{-1}$  signal is  
488 enhanced at the surface cracks, most likely due to the presence of exposed unsaturated lattices or  
489 lattice defects that can chemisorb  $\text{CO}_2$  and therefore also  $\text{TiCl}_4$ . It should be emphasized here that  
490 exposure to  $\text{CO}_2$  only happens for the LaOCl spherical caps after either ethylene polymerization or in  
491 the case of this pristine sample when performing *ex-situ* surface analysis. Therefore, the presence of  
492 these carbonate absorbed species isn't expected to be present during the grafting of  $\text{TiCl}_4$  in an inert  
493 atmosphere. The subsequent times show a full spherical cap (top left), zoom-in micrograph (top right)  
494 and the corresponding intensity maps for the  $1461 + 1471\text{ cm}^{-1}$  vibration (magenta) and the  $1600\text{ cm}^{-1}$   
495 vibration (cyan), respectively.

496

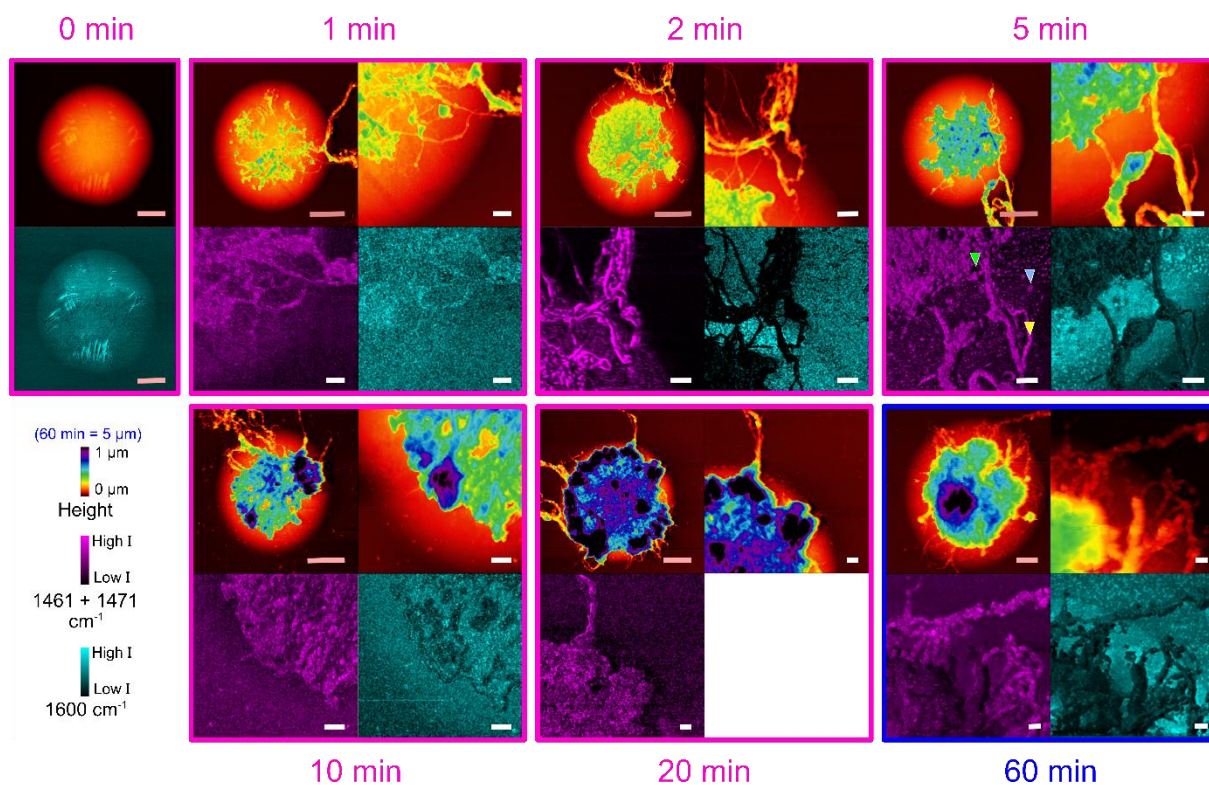

497  
 498 **Figure S15. Individual Photo-induced Force micrographs of a full spherical cap, a zoom-in and the**  
 499 **corresponding intensity maps for the  $1461 + 1471 \text{ cm}^{-1}$  and  $1600 \text{ cm}^{-1}$  vibrations on different ethylene**  
 500 **polymerization times.** Per polymerization time, the height micrographs are shown for a full spherical cap (top left)  
 501 and a zoom-in (top right). The corresponding PiFM intensity maps are shown for the  $1461 + 1471 \text{ cm}^{-1}$  vibrations  
 502 (magenta), and the  $1600 \text{ cm}^{-1}$  vibration (cyan) representing the PE and catalyst support, respectively. Note that the  
 503 z-scale for all height micrographs is  $1 \mu\text{m}$ , except for 60 min polymerization time, which has a z-scale of  $5 \mu\text{m}$ . The  
 504 pink inset scale bars represent  $5 \mu\text{m}$  while the white scale bars represent  $1 \mu\text{m}$ .

505 The extracted point spectra from the three markers, shown in the  $1461+1471 \text{ cm}^{-1}$  PiFM map in Figure  
 506 S15 for the 5 min ethylene polymerized sample, are given in Figure S16. The markers show that on  
 507 top of a polyethylene fibre that only the doublet peaks of the  $1461+1471 \text{ cm}^{-1}$  are present, which  
 508 belong to a crystalline polyethylene phase. The other two markers on low intensity regions (of the  
 509  $1461+1471 \text{ cm}^{-1}$  signal) that are closer to respectively the centre and edge of the spherical cap show a  
 510 broad band around  $1600 \text{ cm}^{-1}$ , which is attributed to adsorbed  $\text{CO}_2$  surface species on the LaOCl  
 511 framework after exposure of the sample to air and therefore allows us to also localize LaOCl with  
 512 PiFM. On these positions, especially for the green marker one can still distinguish the doublet peak of  
 513 polyethylene from the background, albeit with a poor signal to noise ratio.

514

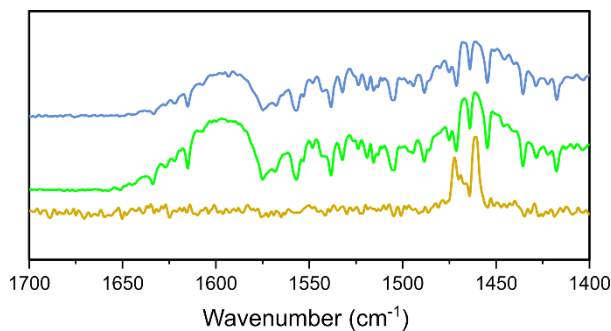

515  
 516 **Figure S16. Point spectra recorded using Photo-induced Force Microscopy (PiFM) on the markers indicated**  
 517 **in Figure S15 for the 5 min sample.** Especially for the green and blue point spectra, a significant interference of  
 518 water vapour can be observed for the LaOCl catalyst framework. The yellow spectrum is recorded on a polyethylene  
 519 fibre and shows the characteristic polyethylene -CH<sub>2</sub>- bending vibrations at 1461 and 1471 cm<sup>-1</sup>.

520  
 521 The spectra shown in Figure 3c were obtained after averaging all spectra obtained on 9 different  
 522 patterns per polymerization time. The spectra were pre-processed by applying a Whittaker baseline  
 523 correction and normalization using the PLS Toolbox of Eigenvector. All individual spectra were then  
 524 subjected to a multivariate curve resolution (MCR) analysis with non-negativity constraints, in which 4  
 525 spectral components were generated, as shown in Figure S17.

526

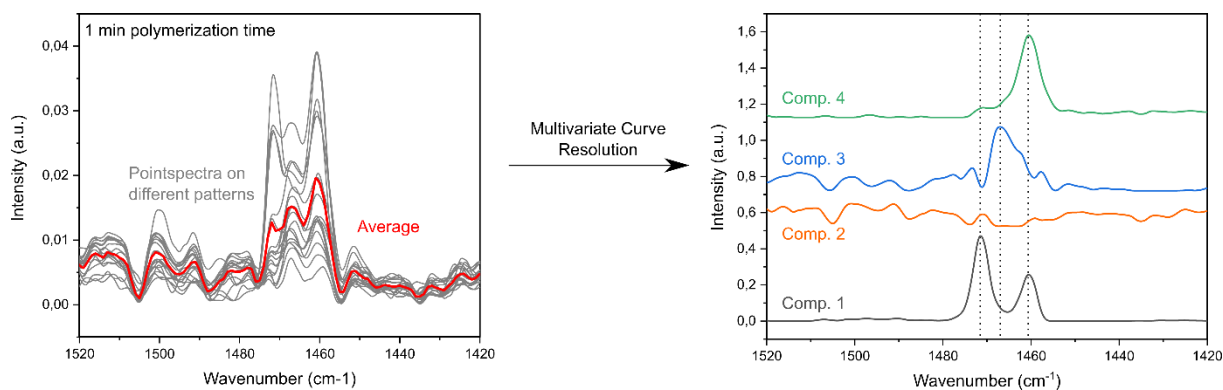

527  
 528 **Figure S17. Point spectra recorded on 9 different LaOCl spherical caps after 1 min ethylene polymerization**  
 529 **and the 4 different spectral components used in a multivariate curve resolution (MCR) analysis.** The different  
 530 spectral components represent the crystalline polyethylene phases (spectral components 1 and 4) as they consist  
 531 purely of the -CH<sub>2</sub>- bending vibrations of crystalline polyethylene in the orthorhombic phase, whereas spectral  
 532 component 3 consists of a broad amorphous polyethylene -CH<sub>2</sub>- bending vibration. Spectral component 2  
 533 represents interference caused by moisture present in the system and hence on the LaOCl surface and the PiFM  
 534 scanning tip.

535 The recorded spectra were then fitted by summing the components multiplied by a certain score.  
536 Hence, this score represents the contribution of a certain component to this spectrum. Spectral  
537 components 1 and 4 represent the crystalline polyethylene -CH<sub>2</sub>- bending vibrations,  $B_{1u}$  and  $B_{2u}$ , at  
538 respectively 1461 and 1471 cm<sup>-1</sup>, whereas component 3 is comprised of a broad band centred around  
539 1464 cm<sup>-1</sup> and is attributed to an amorphous polyethylene phase [13]. It should be noted here that a  
540 100% crystalline polyethylene phase isn't feasible as the degree of crystalline is limited by the high  
541 viscosity of the polyethylene chains and thus this amorphous polyethylene contribution should always  
542 be present [14]. Spectral component 2 represents the water vapour interference, and hence we can  
543 compare the crystallinity within our own dataset by taking the percentage of the crystalline  
544 components (1 + 4) over all PE components (1 + 3 + 4), plotted in the main manuscript Figure 3c.  
545 Note that these percentages are an outcome of our MCR scores and hence don't represent the mass  
546 or molar percentage of crystalline PE, but still can be used to study the evolution of crystallinity over  
547 time within this dataset.

548 Figure S18 shows the average PiF spectra recorded on multiple MgO/MgCl<sub>2</sub> caps after increasing  
549 polymerization times (topology micrographs of representative patterns are shown at the bottom). An  
550 identical MCR analysis with the same components was performed as done on the LaOCl system, and  
551 the resulting percentage of crystalline components over polymerization time is shown in Table S2 for  
552 both the MgO/MgCl<sub>2</sub> and LaOCl system (also shown in the main manuscript Figure 3c).

553 Noteworthy, we see a similar saturation of the fraction of crystalline components for both systems.  
554 However, the saturation for the Mg system seems to happen at lower ratios. This might be related to the  
555 difficulty experienced while measuring the MgO/MgCl<sub>2</sub> system: the caps were very irregular due to  
556 hydration under ambient conditions leading to frequent presence of PiFM tip artefacts that can influence  
557 the quality of the spectra obtained. This becomes clear in Table S2 with the larger error for the  
558 MgO/MgCl<sub>2</sub> system, especially at earlier polymerization times where less polyethylene is formed and  
559 more MgO/MgCl<sub>2</sub> is exposed. It should be noted that these percentages represent a ratio of MCR  
560 components and not an absolute degree of polyethylene crystallinity. Nonetheless, we can conclude  
561 that the saturation of the fraction of crystalline components takes place for both systems already after  
562 roughly 10 minutes of ethylene polymerization under mild slurry-phase conditions.

563

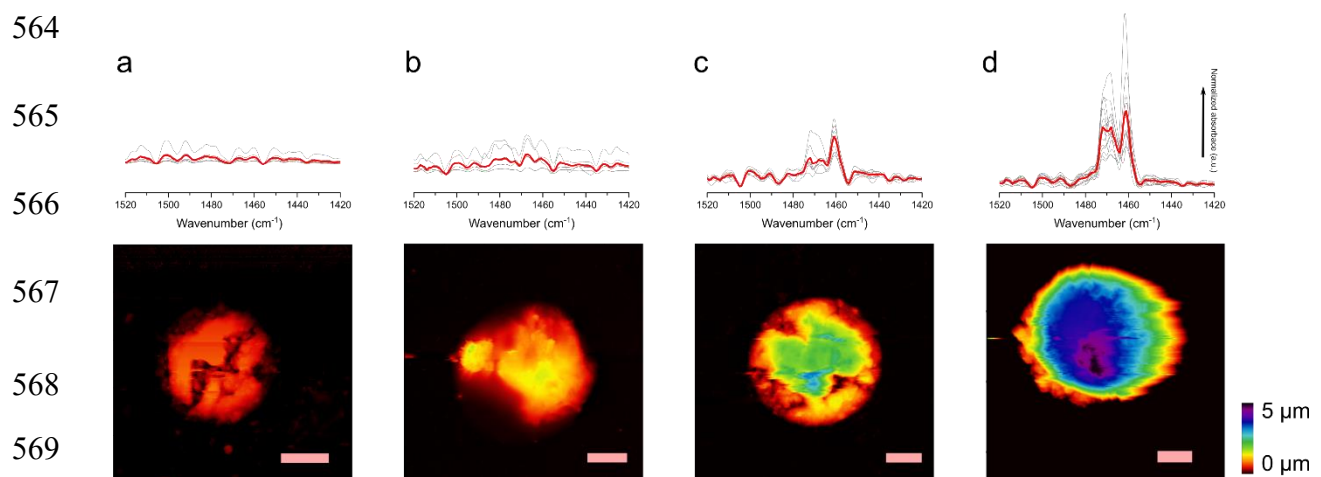

570 **Figure S18. Photo-induced force microscopy (PiFM) point spectra (top) recorded on multiple (10-15)**  
 571 **MgO/MgCl<sub>2</sub> caps after a) 0, b) 2, c) 10 and d) 60 min polymerization time.** Atomic force microscopy images  
 572 recorded using PiFM of representative patterns are shown at the bottom. The red spectrum represents the average  
 573 of all recorded spectra (grey) for that specific polymerization time as also performed in Figure S17 for the LaOCl  
 574 spherical cap samples. The scale bars represent 2  $\mu\text{m}$ .

575 **Table S2. Overview of the fraction of crystalline components (1461  $\text{cm}^{-1}$  and 1471  $\text{cm}^{-1}$  bands) versus the**  
 576 **amorphous single amorphous component (broad band at 1463  $\text{cm}^{-1}$ ).** The fractions were assessed with MCR  
 577 analysis on the PiF spectra (as explained in Figure S17) obtained at respectively, 2, 10 and 60 min of ethylene  
 578 polymerization on both MgO/MgCl<sub>2</sub> caps and LaOCl spherical caps after functionalization with TiCl<sub>4</sub>.

| Sample                                        | Polymerization time (min) |                |                |
|-----------------------------------------------|---------------------------|----------------|----------------|
|                                               | 2                         | 10             | 60             |
| <b>MgO/MgCl<sub>2</sub></b>                   | 39,17 $\pm$ 10,4          | 64,4 $\pm$ 5,8 | 62,5 $\pm$ 6,0 |
| <i>Mean of crystalline MCR components (%)</i> |                           |                |                |
| <b>LaOCl</b>                                  | 49,4 $\pm$ 4,8            | 88,6 $\pm$ 4,5 | 80,2 $\pm$ 4,4 |
| <i>Mean of crystalline MCR components (%)</i> |                           |                |                |

579

580

581

582

583

584



## 585           **5. Scanning Electron Microscopy**

586

587    In Figure S19, an overview is given of the SEM results of all ethylene polymerization times, starting at  
588    the top with a pristine LaOCl spherical cap sample up to 60 min of ethylene polymerization at the  
589    bottom. From left to right first, an overview of multiple LaOCl spherical caps at a specific ethylene  
590    polymerization is provided, followed by a single spherical cap and finally a zoom-in on this spherical  
591    cap. Starting at the 1 min ethylene polymerized sample, it becomes clear that the polyethylene fibres  
592    that are extruded out of the spherical caps contain large amounts of small LaOCl fragments. The  
593    extrusion of the polyolefin fibres has been reported for immobilized single-site catalysts in well-defined  
594    microporous and mesoporous support matrixes for polyolefin catalysts, such as the silica-based MCM-  
595    41 and SBA-15 with pore diameters in the range of 2-25 nm [15-20]. The small LaOCl fragments must  
596    have been peeled off the internal and possibly external surface of the catalyst. This indicates the  
597    presence of the shrinking core or also called layer-by-layer fragmentation model, as illustrated in  
598    Figure S21. After ten min of ethylene polymerization, the external surface of the centre of the spherical  
599    caps are observed to be fully covered in a polyethylene fibre network. Additionally, starting at this  
600    polymerization time, large LaOCl fragments are observed to lay intertwined with and on top of this  
601    polyethylene fibre network. The zoom-in on the 10 min ethylene polymerized sample shows one such  
602    large LaOCl fragment laying on top of the centre of the spherical cap and is actually observed to  
603    already have been cleaved into several smaller fragments that are being pushed away from each  
604    other by the growing polyethylene fibres. This internal cleavage shows the presence of the continuous  
605    bisection fragmentation model, as illustrated in Figure S21, occurring even at the external surface of  
606    the spherical cap.

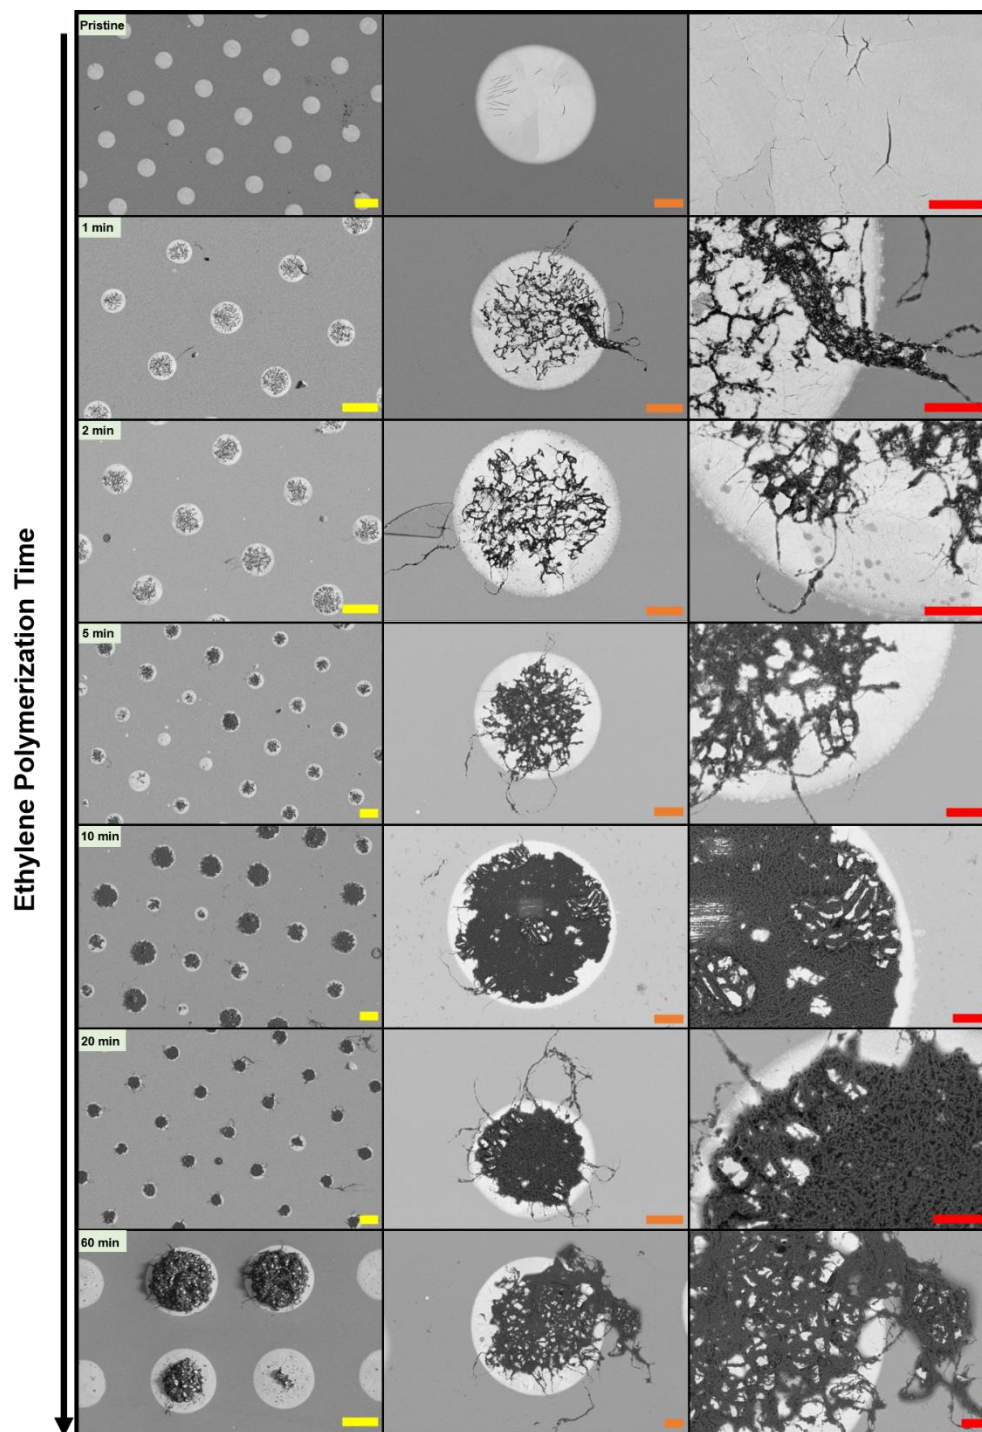

607

608 **Figure S19. Secondary Electron Microscopy (SEM) results on the LaOCl spherical caps after different**  
 609 **ethylene polymerization times.** From left to right first, an overview consisting of multiple LaOCl spherical caps at  
 610 a certain polymerization time are given followed by a single spherical cap and finally a zoom-in on that specific  
 611 spherical cap. From top to bottom, an increase of ethylene polymerization time is given, starting at a pristine non-  
 612 polymerized sample and going up to 60 min of ethylene polymerization. The yellow, orange and red scalebars  
 613 represent a width of respectively 20, 5 and 2 microns.

614 In Figure S20 an overview is given of the SEM results on the reference MgO/MgCl<sub>2</sub> caps for a pristine,  
615 2, 10 and 60 min ethylene polymerized samples. From left to right, full single caps are first shown in a  
616 top-down fashion followed by a zoom-in and then repeated as cross-sectional images on the exact  
617 same caps with again a full size image and a zoom-in. The pristine MgO/MgCl<sub>2</sub> caps, which have been  
618 exposed to moisture due to the absence of a transfer chamber for the SEM, shows a rough appearing  
619 surface with some large exposed cracks and seems to bleed onto the Si(100) substrate. This bleeding  
620 effect could be due to the rapid vacuum treatment used to evacuate the SEM chamber upon sample  
621 transfer of the hydrated MgCl<sub>2</sub> layer. This high moisture sensitivity of the MgO/MgCl<sub>2</sub> caps was also  
622 observed earlier in supplementary information section 4 with AFM time-lapse measurements before  
623 and after exposure of the MgO/MgCl<sub>2</sub> pristine caps to moisture. Upon 2 min of ethylene polymerization  
624 the first polyethylene fibers and globules can be observed on the caps, albeit that the weak Z-contrast  
625 between MgO/MgCl<sub>2</sub> and polyethylene as compared to LaOCl make it more difficult to observe at this  
626 stage. It is only upon increased polymerization times, ergo 10 and 60 min, that the imaging contrast  
627 between the MgO/MgCl<sub>2</sub> support matrix and the formed polyethylene becomes clear enough due to  
628 the strong fragmentation of the original support matrix to spatially resolve the different chemical phase.  
629 Here it becomes clear that the MgO/MgCl<sub>2</sub> support matrix is mainly fragmenting internally into  
630 successively smaller units according to the continuous bisection. Especially for the 60 min polymerized  
631 sample, a complete disintegration of the framework is observed where small MgO/MgCl<sub>2</sub> fragments  
632 only a few tens of nm in size are homogeneously distributed within the formed polyethylene phase. At  
633 the highest point in this specific cross-section, a thickness of 7.2 μm is obtained, compared to the 5.7  
634 μm thickness for the 60 min LaOCl spherical cap. It should be mentioned here that more  
635 representative values would be obtained with quantitative 3-D or topological measurements such as  
636 AFM (albeit that this sample is too thick for the height limits of the AFM piezo stage) or X-ray nano-  
637 tomography.

638

639

640

641

642

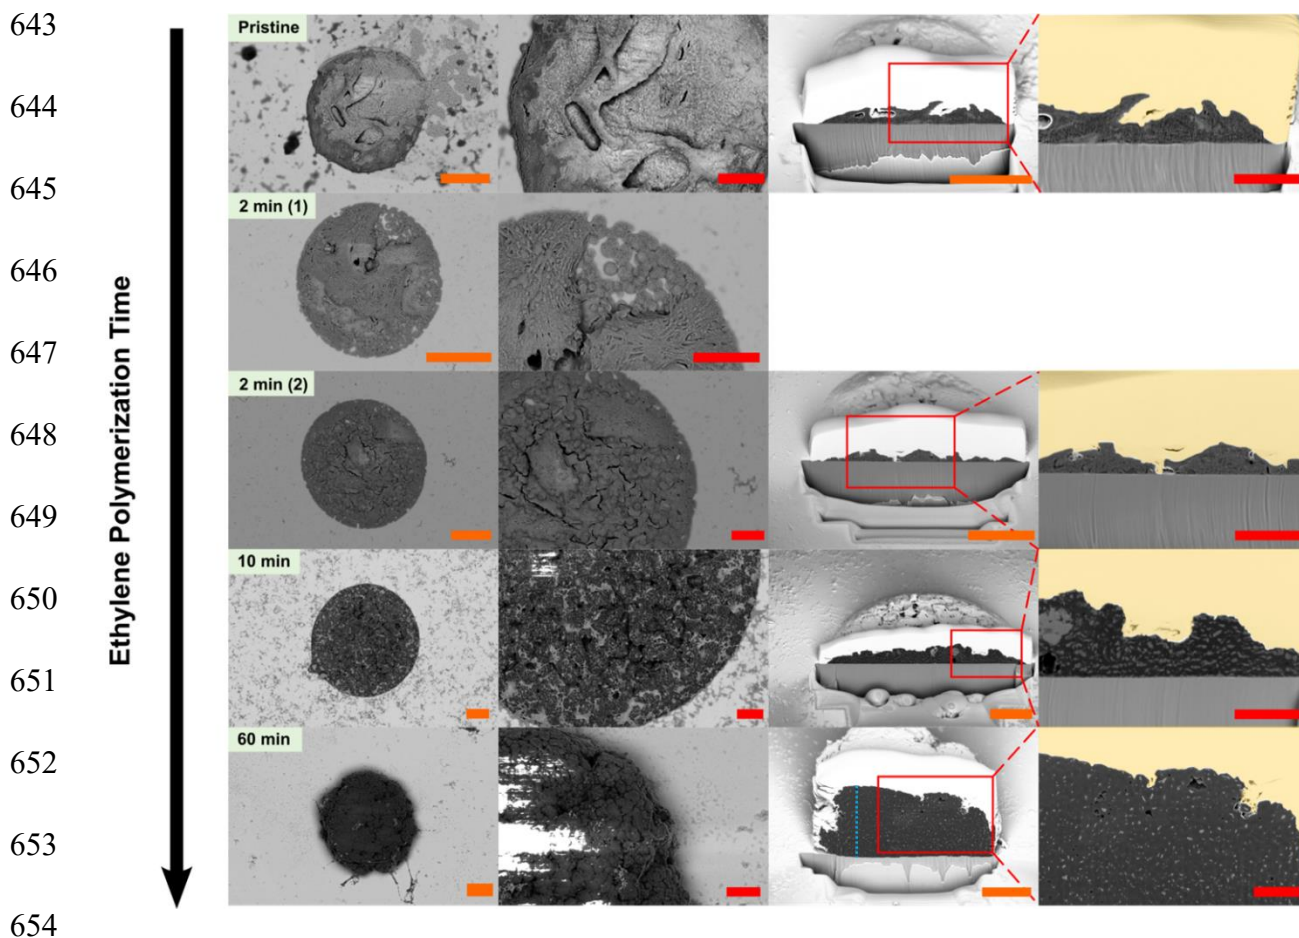

655 **Figure S20. Secondary Electron Microscopy (SEM) results on the reference MgO/MgCl<sub>2</sub> caps after different**  
 656 **ethylene polymerization times.** From left to right first a top-down view of a single cap is shown at a certain  
 657 polymerization time followed by a zoom-in on that specific cap. This is followed by cross-sectional images of the  
 658 same caps and the respective zoom-ins based on the red box. From top to bottom, an increase of ethylene  
 659 polymerization time is given, starting at a pristine non-polymerized sample and going up to 60 min of ethylene  
 660 polymerization. The orange and red scalebars represent a width of respectively 5 and 2 microns. The cyan dashed  
 661 line in the cross-sectional SEM image of the 60 min ethylene polymerized MgO/MgCl<sub>2</sub> cap depicts a length of 7.2  
 662 microns.

663  
664  
665  
666  
667

668

669

670

671

672

673

674

675

676

677

678

679

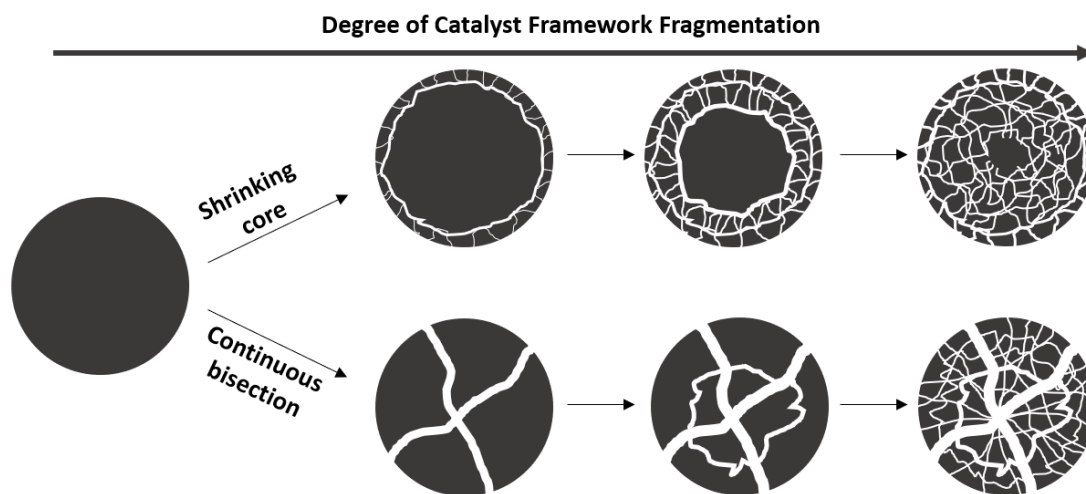

677 **Figure S21. Schematic representation of the shrinking core and continuous bisection limiting modes of**  
678 **catalyst framework fragmentation.** The shrinking core fragmentation mode starts at the surface of the catalyst  
679 particle whereas the continuous bisection fragmentation mode starts at the core outwards.

680

681

682

683

684

685

686

687

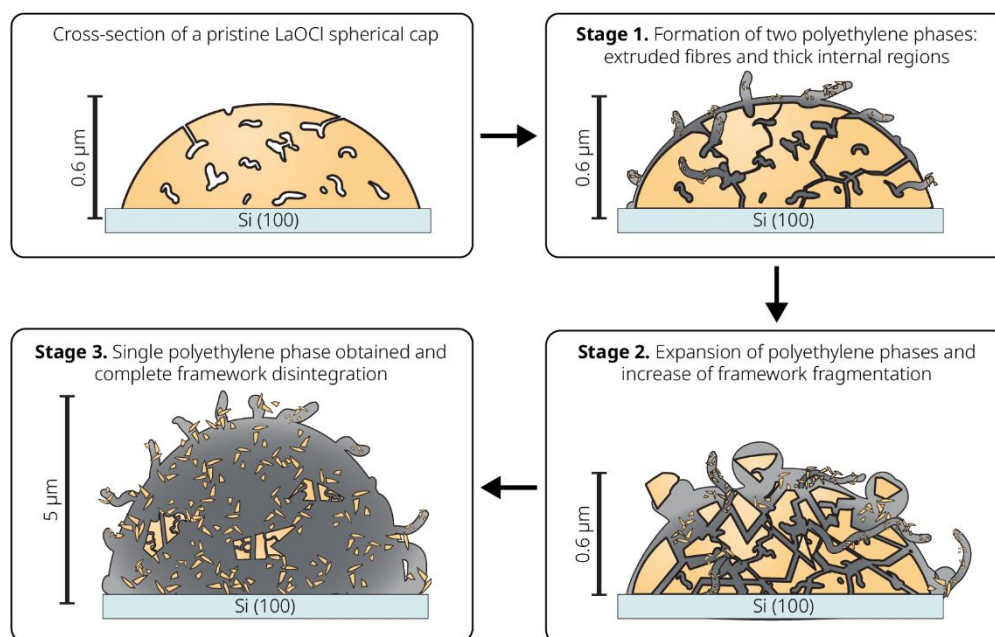

688 **Figure S22. A schematic representation of the fragmentation behaviour of the LaOCl spherical cap model**  
689 **system during ethylene polymerization.** Three different polymerization stages are drawn, starting from the pristine  
690 spherical cap. In the first stage (i) the internal macroporous cavities and externally accessible cracks of the LaOCl spherical cap  
691 starts to be filled with polyethylene and leads to both the extrusion of polyethylene fibres from these cracks, as well as a locally  
692 heavy degree of framework fragmentation at the outer rim of the spherical caps, indicating the occurrence of both the shrinking

693 core and continuous bisection fragmentation models in Figure S21. In the second stage (ii) both polymer phases, that is the  
694 extruded polyethylene fibres and the thick internal polyethylene regions at the outer rims of the spherical caps, keep growing  
695 steadily and cause the formation of additional cracking lines on the framework. Finally, in the third stage (iii) the original morphology  
696 of the spherical caps has disintegrated into both large and small LaOCl fragments that are dispersed uniformly throughout the  
697 polymer phase, showing that the continuous bisection fragmentation model has become dominant.

698 The SEM images and EDX maps, shown in Figure S23 of the pristine and 20 min ethylene  
699 polymerized sample, are of the same spherical caps, as shown in Figures 2 and 4. EDX shows the  
700 presence of La, O and Cl, the constituents of LaOCl both before and after ethylene polymerization.  
701 The high photon energies of especially La at 4651 eV for the  $La\alpha_1$  emission line means that the formed  
702 polyethylene phase (carbon binding energy is  $\sim 284$  eV) will barely lead to attenuation of these photons  
703 and therefore cause the La phase to be easily observable through the polymer phase. For the pristine  
704 LaOCl spherical cap, only a small contribution of carbon is found, most likely due to the adsorption of  
705 carbonate species due to exposure to air during sample transfer. However, after 20 min of ethylene  
706 polymerization, the carbon signal of the formed polyethylene phase becomes clear.

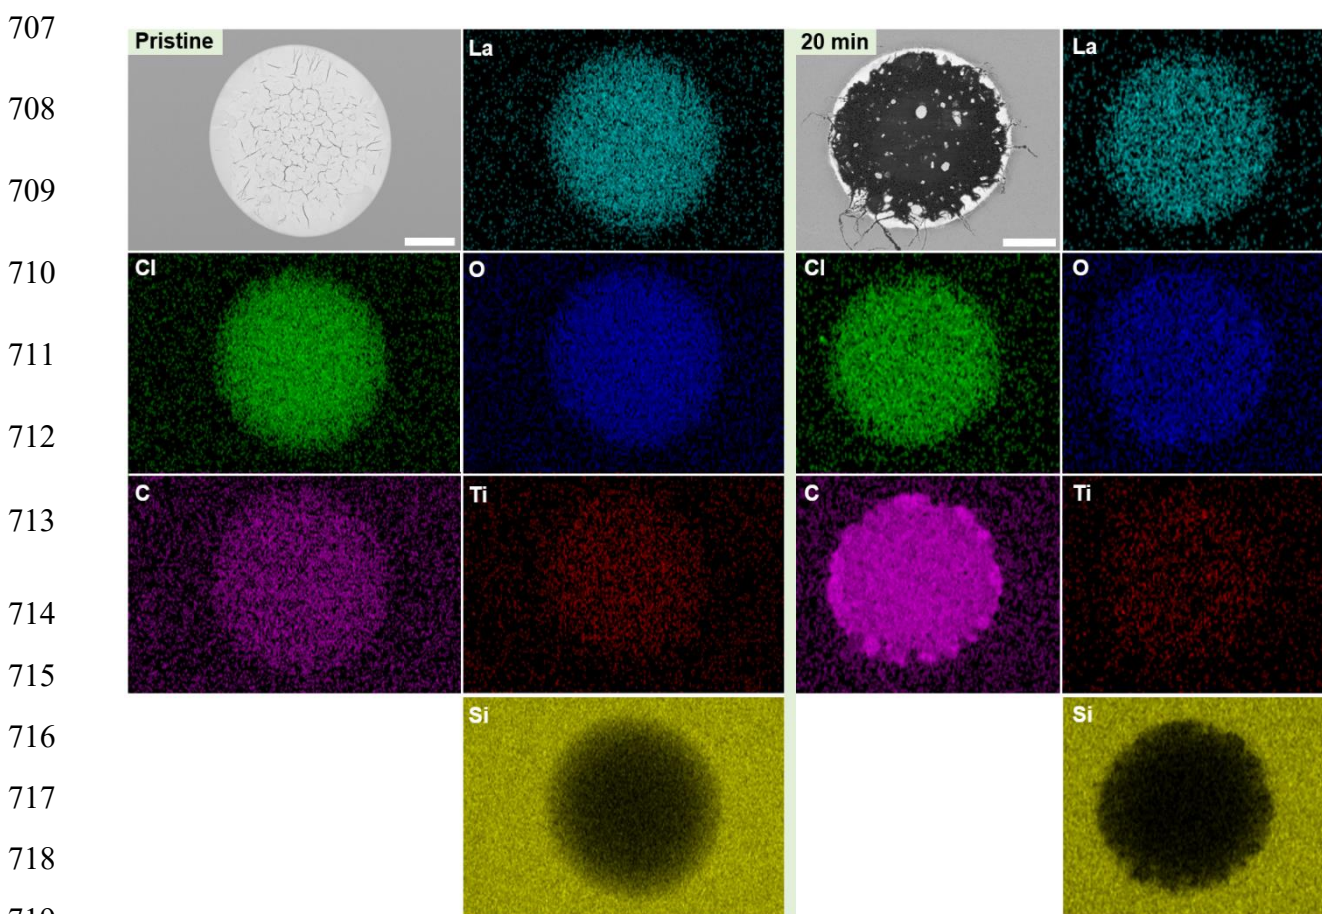

720

721  
 722 **Figure S23. Top-view Secondary Electron Microscopy Energy Dispersive X-ray spectroscopy (SEM-EDX)**  
 723 **results on the LaOCl spherical caps before and after ethylene polymerization.** On the left and right side, the  
 724 top-view back-scattered electron images of respectively the pristine and 20 min ethylene polymerized spherical  
 725 caps are given alongside the EDX maps of La, Cl, O, C, Ti and Si. The scalebars depict a width of 10 microns.

726 The SEM and EDX images, shown in Figure S24, belong to the cross-sectional regions of the pristine,  
 727 2 min and 60 min of ethylene polymerization, as shown in Figure 4. The cross-sections are taken  
 728 around the centre of each spherical cap. For the pristine LaOCl spherical cap, no carbon phase is  
 729 observed within the cross-section, as expected, whereas for the 2 min ethylene polymerized sample a  
 730 faint carbon signal can be seen, albeit difficult due to the deposition of carbon on the platinum coating  
 731 above the spherical cap during the sputtering process. For the 60 min ethylene polymerization, a clear  
 732 carbon phase can be observed now, as well as the LaOCl fragments dispersed within the carbon  
 733 phase.

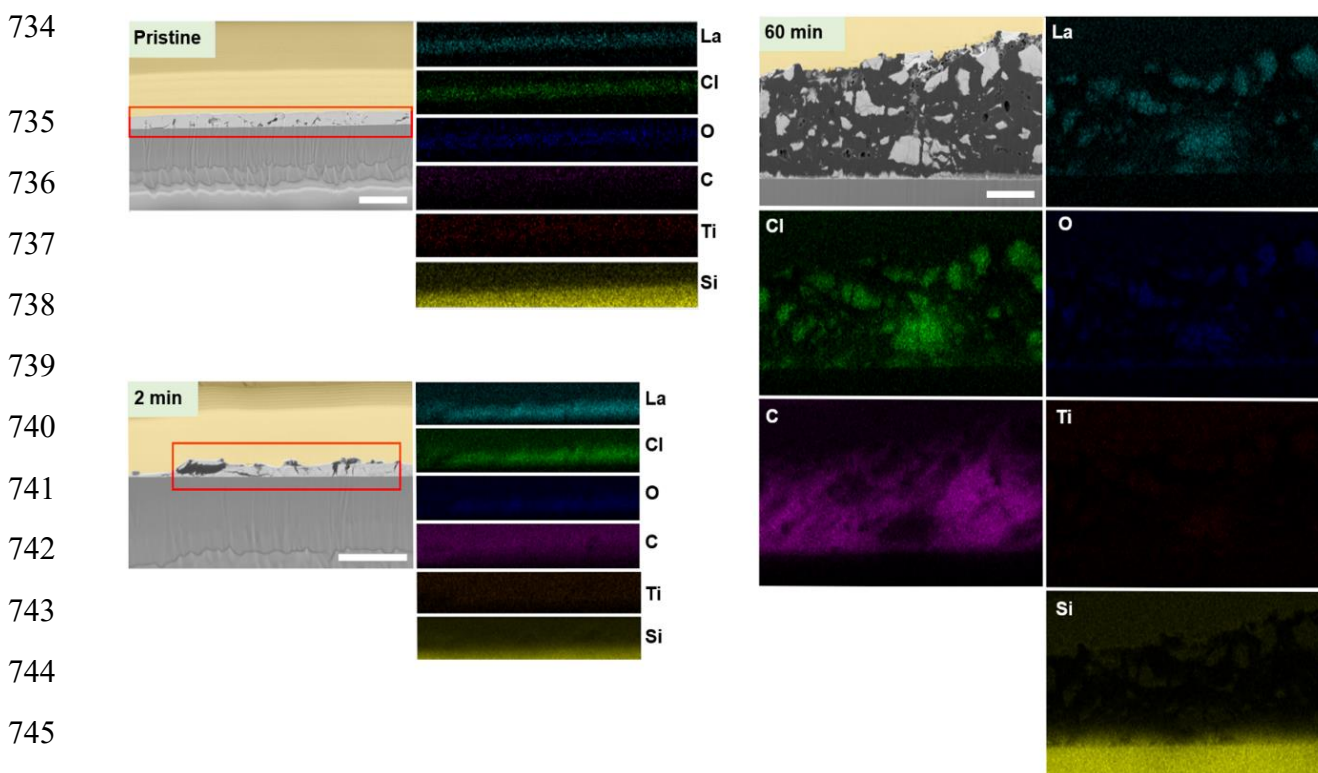

747 **Figure S24. Cross-sectional Secondary Electron Microscopy Energy Dispersive X-ray spectroscopy (SEM-**  
 748 **EDX) results on the LaOCl spherical caps before and after ethylene polymerization.** The cross-sectional back-  
 749 scattered electron images alongside the EDX maps of La, Cl, O, C, Ti and Si are given for the pristine, 2 min and  
 750 60 min of ethylene polymerization. The red boxes in the SEM images portray the area of the EDX maps in case it

751 is smaller than the SEM image shown. The scalebars depict a width of 2 microns. A yellow, transparent overlay is  
752 provided that indicates the coated Pt layer, all though in some cases it is observed to penetrate into the porous  
753 polyethylene layer.

754 In Figure S25, the SEM-EDX images are shown of the pristine and 60 min ethylene polymerized  
755 reference MgO/MgCl<sub>2</sub> caps from a top-down perspective. The SEM-EDX of the pristine sample shows  
756 the presence of the Mg, O and Cl signals, which is expected from the MgO/MgCl<sub>2</sub> core-shell structure  
757 as reported by Chammingkwan *et al.* [21]. Despite the use of TiCl<sub>4</sub> as the chlorinating agent to convert  
758 MgO partially into MgO/MgCl<sub>2</sub> as well as that TiCl<sub>4</sub> is the pre-active site, EDX shows no clear signal for  
759 Ti on the pristine sample. This might indicate a lower weight loading of Ti on the MgO/MgCl<sub>2</sub> caps with  
760 respect to the LaOCl spherical caps where the Ti signal was noticeable in Figure S23. The odd shape  
761 of the pristine MgO/MgCl<sub>2</sub> cap could be due to the hydration of the framework upon transfer through  
762 ambient conditions towards the SEM apparatus, who's severe effect was shown before by the AFM  
763 time-laps in Figure S14. The SEM-EDX images of the 60 min sample clearly show the presence of a  
764 highly intense carbon signal, which is attributed to the polyethylene phase when taking the Raman and  
765 PiFM results into account. Here the carbon signal is so intense that no clear presence of the Mg, O or  
766 Cl peaks from the catalyst framework can be observed.

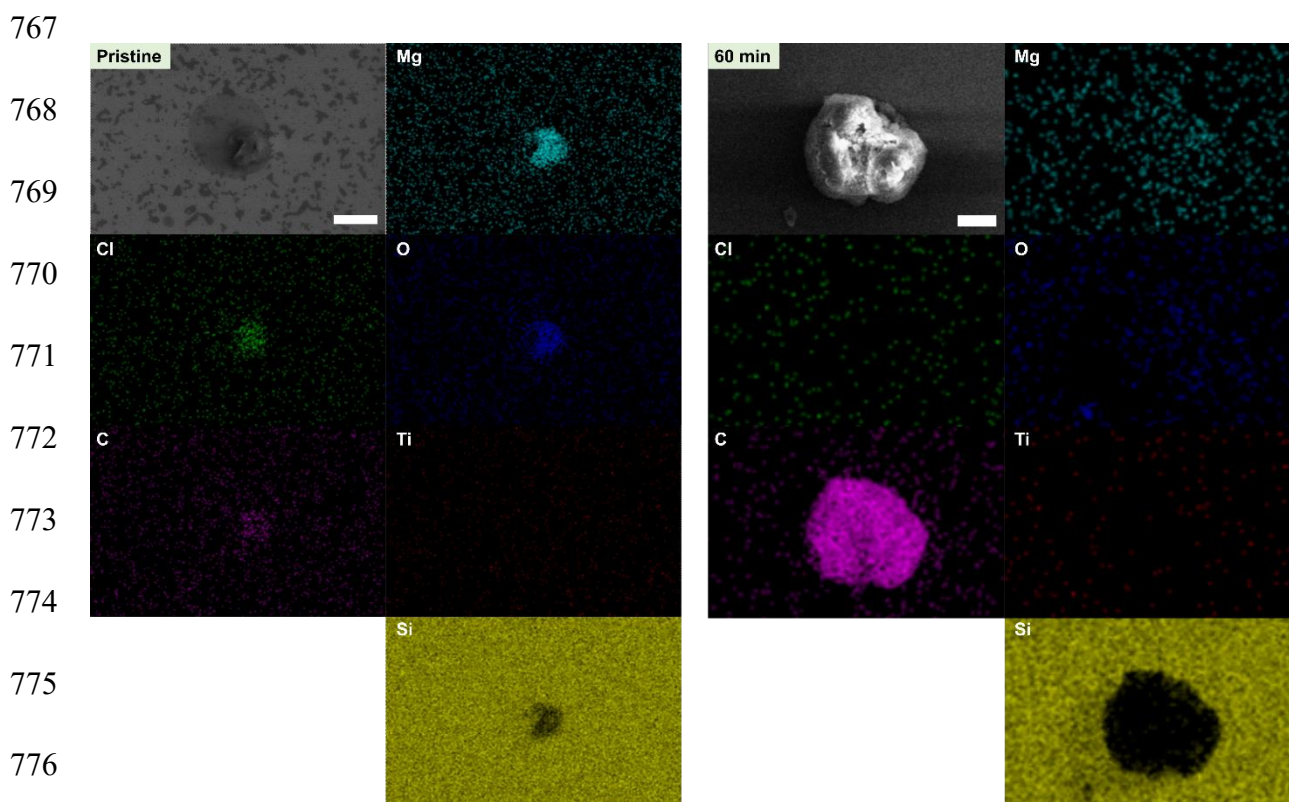



777 **Figure S25. Top-view Secondary Electron Microscopy Energy Dispersive X-ray spectroscopy (SEM-EDX)**  
778 **results on the reference MgO/MgCl<sub>2</sub> caps before and after ethylene polymerization.** On the left and right side,  
779 the top-view back-scattered electron images of respectively the pristine and 60 min ethylene polymerized caps are  
780 given alongside the EDX maps of Mg, Cl, O, C, Ti and Si. The scalebars depict a width of 10 microns.

781 In Figure S26, the cross-sectional SEM-EDX images are shown for the pristine, 2 and 60 min ethylene  
782 polymerized reference MgO/MgCl<sub>2</sub> caps. The pristine sample shows that the extent of MgO chlorination  
783 seems to be uniform from the external surface towards the interface with the Si(100) substrate and  
784 therefore TiCl<sub>4</sub> pre-active sites could potentially speaking be chemisorbed also uniformly throughout the  
785 MgO/MgCl<sub>2</sub> volume (on exposed, unsaturated lattices that is) all though again the Ti weight loading  
786 seems to be below the detection limit of these EDX experiments. For the 2 min ethylene polymerized  
787 sample, the Mg, Cl, O and C signals are all visible whereas for the 60 min ethylene polymerized sample,  
788 Mg is barely visible with Cl and O signals being too diluted within the highly intense C signal from the  
789 formed polyethylene. The zoom-in cross-sectional image of this same 60 min ethylene polymerized cap  
790 in Figure S20 also showed how finely the original MgO/MgCl<sub>2</sub> has fragmented as compared to the 60  
791 min ethylene polymerized LaOCl spherical cap where larger support fragments were still clearly visible  
792 with EDX.

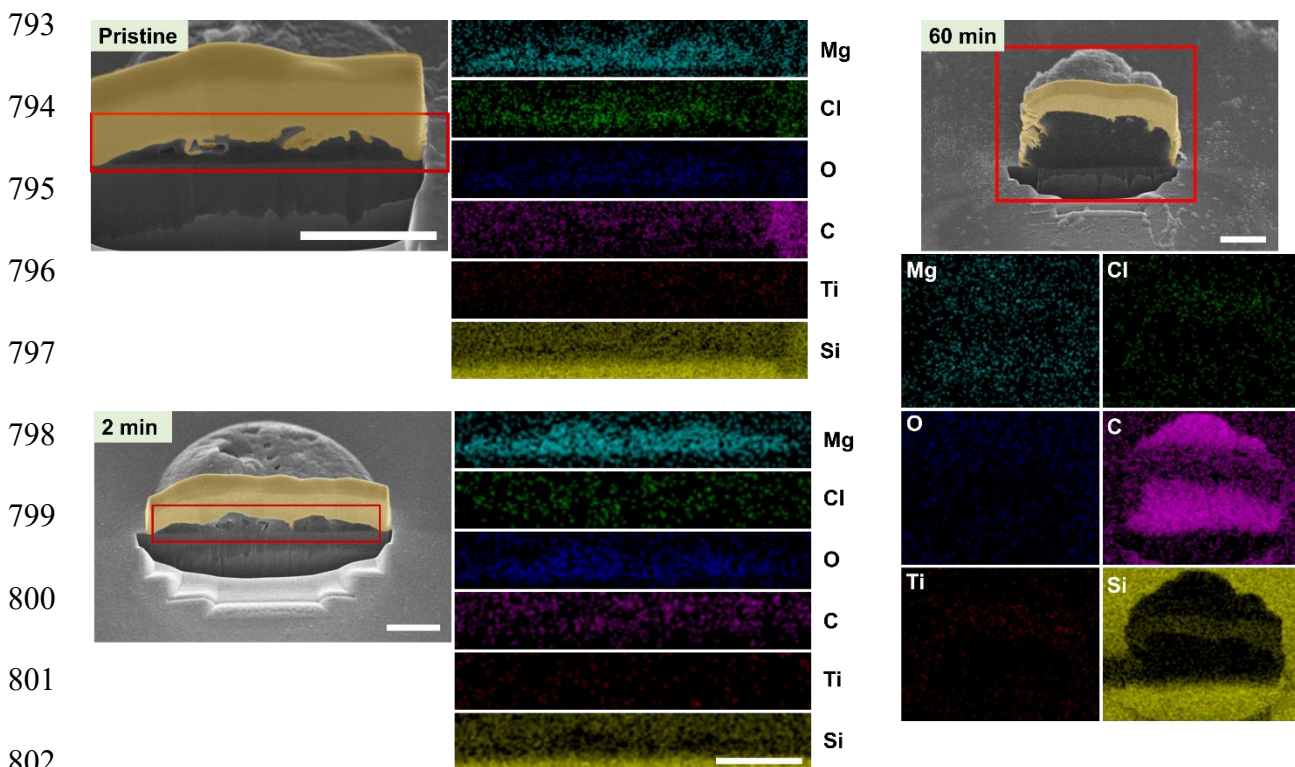

803

804 **Figure S26. Cross-sectional Secondary Electron Microscopy Energy Dispersive X-ray spectroscopy (SEM-**  
805 **EDX) results on the refence MgO/MgCl<sub>2</sub> caps before and after ethylene polymerization.** The cross-sectional  
806 back-scattered electron images alongside the EDX maps of Mg, Cl, O, C, Ti and Si are given for the pristine, 2 min  
807 and 60 min of ethylene polymerization. The red boxes in the SEM images portray the area of the EDX maps in case  
808 it is smaller than the SEM image shown. The scalebars depict a width of 5 microns. A yellow, transparent overlay  
809 is provided that indicates the coated Pt layer, all though in some cases it is observed to penetrate into the porous  
810 polyethylene layer.

## 811 **Supplementary References**

- 812 (1) Li, J.P.H., *et al.*, Understanding of binding energy calibration in XPS of lanthanum oxide by *in situ*  
813 treatment, *Phys. Chem. Chem. Phys.*, **21**, 22351-22358 (2019).
- 814 (2) Magni, E., Somorjai, G.A., Surface science study of model Ziegler-Natta catalysts, *Surf. Sci.*, **377**, 824-  
815 827 (1997).
- 816 (3) Van der Heijden, A.W.A.M., *et al.*, Destructive Adsorption of CCl<sub>4</sub> over Lanthanum-Based Solids: Linking  
817 Activity to Acid-Base Properties, *J. Phys. Chem. B.*, **109**, 23993-24001 (2005).
- 818 (4) Podkolzin, S.G., Manoilova, O.V., Weckhuysen, B.M., Relative Activity of La<sub>2</sub>O<sub>3</sub>, LaOCl, and LaCl<sub>3</sub> in  
819 Reaction with CCl<sub>4</sub> Studies with Infrared Spectroscopy and Density Functional Theory Calculations, *J.*  
820 *Phys. Chem. B*, **109**, 11634-11642 (2005)
- 821 (5) Kern, S., Kern, C., Rohnke, M., Mass spectra database of polymers for bismuth-cluster ToF-SIMS, *Surf.*  
822 *Sci. Spectra*, **26**, 025003 (2019).
- 823 (6) Oberg, E., Jones, F.D., Horton, H.L., Ryffel, H.H., *Machinery's handbook: a reference book for the*  
824 *mechanical engineer, designer, manufacturing engineer, draftsman, toolmaker, and machinist* (Industrial  
825 Press, New York, 1988).
- 826 (7) Bossers, K.W., Valadian, R., Zaroni, S., Smeets, R., Friederichs, Garrevoet, J., Meirer, F., Weckhuysen,  
827 B.M., Correlated X-ray Ptychography and Fluorescence Nano-Tomography on the Fragmentation  
828 Behavior of an Individual Catalyst Particle during the Early Stages of Olefin Polymerization, *J. Am.*  
829 *Chem. Soc.*, **142**, 3691-3695 (2020).
- 830 (8) Bossers, K.W., Valadian, R., *et al.*, Heterogeneity in the Fragmentation of Ziegler Catalyst Particles  
831 during Ethylene Polymerization Quantified by X-ray Nanotomography, *JACS Au*, **1**, 852-864.
- 832 (9) Horácková, B., Grof, Z., Kosek, J., Dynamics of fragmentation of catalyst carries in catalytic  
833 polymerization of olefins, *Chem. Eng. Sci.*, (**62**, 5264-5270, 2007).
- 834 (10) Seda, L., Zubov, A., Bobak, M., Kosek, J., Kantzas, A., Transport and Reaction Characteristics of  
835 Reconstructed Polyolefin Particles, *Macromol. React. Eng.*, (**2**, 496-512, 2008).
- 836 (11) Manoilova, O.V. *et al.*, Surface Acidity and Basicity of La<sub>2</sub>O<sub>3</sub>, LaOCl, and LaCl<sub>3</sub> Characterized by IR  
837 Spectroscopy, TPD, and DFT Calculations, *J. Phys. Chem. B.*, **108**, 15770-15781 (2004).
- 838 (12) Alizadeh, S., Mousavi-Kamazani, M., Salavati-Niasari, M., Hydrothermal Synthesis of Rod-Like LaOCl  
839 Nanoparticles from New Precursors, *J. Clust. Sci.*, **26**, 645-652 (2015).
- 840 (13) Raff, R.A.V., Doak, K.W. *Crystalline Olefin Polymers Part 1*, (John Wiley and Sons Inc., New York,  
841 1965).
- 842 (14) Whiteley, K.S., Heggs, T.G., Koch, H., Mawer, R.L., Immel, W., Polyolefins. In: *Ullmann's Encyclopedia*  
843 *of Industrial Chemistry* (Wiley-VCH, Weinheim, 2005).
- 844 (15) Ko, Y.S., Woo, S.I., Tailor-made Polymers: Via Immobilization of Alpha-Olefin Polymerization Catalysts  
845 Ch.10, (Wiley-VCH, Weinheim, 2008).
- 846 (16) Ko, Y.S., Han, T.K., Park, J.W., Woo, S.I., Propene polymerization catalyzed over MCM-41 and VPI-5  
847 supported Et(ind)<sub>2</sub>ZrCl<sub>2</sub> catalysts, *Macromol. Rapid Commun.*, **17**, 749-758 (1996).
- 848 (17) Kageyama, K., Tamazawa, J., Aida, T., Extrusion polymerization: catalyzed synthesis of crystalline linear  
849 polyethylene nanofibers within a mesoporous silica, *Science*, **285**, 2113-2115 (1999).
- 850 (18) Ye, Z., Zu, S., Wang, W., Alsyouri, H., Lin, Y.S., Morphological and mechanical properties of nascent  
851 polyethylene fibers produced via ethylene extrusion polymerization with a metallocene catalyst  
852 supported on MCM-41 particles, *J. Polym. Sci. Part B: Polym. Phys.*, **41**, 2433-2443 (2003).
- 853 (19) Dong, X., *et al.*, Preparation of nano-polyethylene fibers and floccules using MCM-41-supported  
854 metallocene catalytic system under atmospheric pressure, *Eur. Polym. J.*, **41**, 797-803 (2005).
- 855 (20) Kumkaew, P., Wanke, S.E., Parserthadam, P., Danumah, C., Kaliaguine, S., Gas-phase ethylene  
856 polymerization using zirconocene supported on mesoporous molecular sieves, *J. Appl. Polym. Sci.*, **87**,  
857 1161-1177 (2003).
- 858 (21) Chammingkwan, P., Than, V.Q., Terano, M., Taniike, T., MgO/MgCl<sub>2</sub>/TiCl<sub>4</sub> Core-Shell Catalyst for  
859 Establishing Structure-Performance Relationship in Ziegler-Natta Olefin Polymerization, *Topics Catal.*,  
860 **57**, 911-917 (2014).
- 861
